# Supplementary material for: Integrated mechanism for the generation of the 5′ junctions of LINE inserts
Source: Oxford University Press journal article supplement (doi:10.1093/nar/gku1067), 2014-11-06
Supplement: gku1067_Supplementary_Data.zip [file gku1067_Supplementary_Data.zip]

Archive with 4 entries (4 files):
- nar-02442-v-2014-File005.pdf
- nar-02442-v-2014-File003.pdf
- nar-02442-v-2014-File004.docx
- nar-02442-v-2014-File006.xlsx
