# Supplementary material for: Integrated mechanism for the generation of the 5′ junctions of LINE inserts
Source: Oxford University Press journal article supplement (doi:10.1093/nar/gku1067), 2014-11-06
Supplement: gku1067_Supplementary_Data.zip [file gku1067_Supplementary_Data.zip › nar-02442-v-2014-File003.pdf]

**Supplemental Table S1**

**The Sequences of pLEmH, TK109.17, Nb2A3-2.**

## Supplemental Table S2

### Sequences of the 3' and 5' LINE Inserts in Cultured Cells

The upper sequence indicates the 5' end of the insert. The middle sequence indicates the pre-insertion site of human (designated 'hs') and chicken (designated 'gg') chromosomal DNA, the chromosome number, and direction (designated as +/-). The bottom sequence indicates the 3' end of the insert. Chromosomal DNA, black; LINE, blue; 5'-inverted LINE, purple; extra nucleotides, red pink; TSD, bright green; TST, orange; 3' terminal repeat, underline; abnormal 3' terminal repeat, yellow; homologies, asterisks; microhomologies, gray boxes; italics, restriction site of HindIII.

### **Supplemental Table S3**

#### **Summary of LINE Inserts in Cultured Cells**

LR indicates the length of the 3' terminal repeat. An in the table under LR indicates poly(A) tail of unknown length. IL indicates the length of the insertion. 5' MH indicates the length of the 5' microhomology. 5' EX indicates the length of the 5' extra nucleotides. 3' MH indicates the length of the 3' microhomology. 3' EX indicates the length of the 3' extra nucleotides. TSA indicates the target-site alteration; a positive number is the length of target-site duplication; zero indicates blunt-end joining; a negative number is the length of target-site truncation. Chr position indicates the chromosome in which each insertion occurred. +/- indicates the direction of each insertion. Position indicates the nucleotide position of each insertion in the chromosome. ND, could not be determined.
