# Supplementary material for: Integrated mechanism for the generation of the 5′ junctions of LINE inserts
Source: Oxford University Press journal article supplement (doi:10.1093/nar/gku1067), 2014-11-06
Supplement: gku1067_Supplementary_Data.zip [file gku1067_Supplementary_Data.zip › nar-02442-v-2014-File005.pdf]

Table S2

L1.3 / DT40 WT cells

pWLE23. 1a

5' end GGGCTGGCCCTTTGTAGTAAGACGAATTTAGATCTCTAGAAGCTGGGTACCAGCTGCT  
\*\*\*\*\*  
gg\_chr24+ GGGCTGGCCCTTTGTAGTAAGACGAATTTAGATCTCTAGAAGCTGGGTACCAGCTGCT  
\*\*\*\*\*  
3' end AAAAAAAAAAAAAAAAAAGACGAATTTAGCAAGAGTATTTGCAGAATAACACCCT

pWLE25. 1a

5' end ACATGCTTTTAAGAGCATAGAGTCAGATCTCTAGAAGCTGGGTACCAGCTGCTAGCAAGCTAGCTTGC  
\*\*\*\*\*  
gg\_chr2+ ACATGCTTTTAAGAGCATAGAACTGTAACCTGTTAGTTTGTCTGGCCAAAGAAGTTTCTCCTTAAAG  
\*\*\*\*\*  
3' end AAAAAAAAAAGAGCATAGAACTGTAACCTGTTAGTTTGTCTGGCCAAAGAAGTTTCTCCTTAAAG

pWLE25. 2a

5' end TTTGTTTGACCAACAGAACACAATTTGTTAGATCTCTAGAAGCTGGGTACCAGCTGCTAG  
\*\*\*\*\*  
gg\_chr20- TTTGTTTGACCAACAGAACACAATTTGTTAGATCTCTAGAAGCTGGGTACCAGCTGCTAG  
\*\*\*\*\*  
3' end AAAAAAAAAAGAACACAATTTGTTAGCAAGAAACAACCTGGGTTTTGCTACATG

pWLE25. 3a

5' end GAATATCCACAATTCTACAGCTCCCAATGAAATGCATTTGAGATCTCTAGAAGCTGGGTACCAGCTGCTAGCAAGCTAGC  
\*\*\*\*\*  
gg\_chr1+ GAATATCCACAATTCTACAGCTCCCAATGAAATGCATTTGAGATCTCTAGAAGCTGGGTACCAGCTGCTAGCAAGCTAGC  
\*\*\*\*\*  
3' end AAAAAAAAAAAAAAAAAAGTGAATGCATTTGTTAGCAAGAAACAACCTGGGTTTTGCTACATG

pWLE25. 4a

5' end CCAAGAAAAGACATGGC**GCAGATCTCTAGAAGCTGGGTACCAGCTGCTAGCAAGCTAGCTTGCTAGC**  
\*\*\*\*\*  
gg\_chr1- CCAAGAAAAGACATGGCAGCTTTTCTTTTATGGTCAAAAGCTGACTGAAATCAATATTTAGTCTA  
\*\*\*\*\*  
3' end AAAAGAAAAGACATGGCAGCTTTTCTTTTATGGTCAAAACCTGACTGAAATCAATATTTAGTCTA

pWLE27. 7a

5' end AGTGCTAAAAGAAAAA**GAAAAAAACG**AGATCTCTAGAAGCTGGGTACCAGCTGCTAGCAA  
\*\*\*\*\*  
gg\_chr4- AGTGCTAAAAGAAAAA**AAAAAAC**AAACAACCCACAAAACAGTAACAACAAATCTAACTC  
\*\*\*\*\*  
3' end AAAAAAAAAAAAAAAA**GAAAAA**AAACAACCCACAAAACAGTAACAACAAATCTAACTC

pWLE28. 3a

5' end ACTTTTGTGAAGCTTTCAGCACCCGATCTGCAGCCAGGAGCCCTGATGTC**GCAGATCTCTAGAAGCTGGGTACCAGCTGCTAGCAAGCTA**  
\*\*\*\*\*  
gg\_chr 4 + GAAAAGGGAGAGCTTTCAGCACCCAATCTGCAGCCAGGAGCCCTGATGTC**AGAATAGATTTTGCCCAAGGCTCATGGAGGTTTGCTA**  
4983796  
5016533  
gg\_chr4 + GGGGATGCATCAAATTTGCAAGATAGT**AAAAACAATGGAGAGAAGCGATGCTTATGAGTGGCTCTGTTTCAGGCTTATTTTCCACAAGGG**  
\*\*\*\*\*  
3' end AAAAAAAAAAAAAAAAAAAAAAAAAAAACAATGGAGAGAAGCGATGCTTATGAGTGGCTCTGTTTCAGGCTTATTTTCCACAAGGG

pWLE28. 5a

5' end TTACACTGCATCTGACATCTTAGACTCAGCACTAATCAGAACTTCATGTGTC**TTAGTGGGTGCAGCGCACCAGCATGGCACATGTATAC**  
\*\*\*\*\*  
gg\_chr20 - TTACACTGCATCTGACATCTTAGACTCAGCACTAATC**GGAAGCTTCATGTGTC**AAATACAGAACAAATACTGTGGTTTTTTCCCCCTTTT  
\*\*\*\*\*  
3' end AAAAAAAAAAAAAAAAAAAAAAAAAAAAGAAGCTTCATGTGTCAAATACAGAACAAATACTGTGGTTTTTTCCCCCTTTT

pWLE28. 8a

5' end AGAAGAGAGAGCGACGAAGAAAAATCCCTATAAAATTCCTCCTGGAAGGAAGTGGTACCATTCTCTGAAACTATTCCAATCAATA  
\*\*\*\*\*  
gg\_chr1 + AGAAGAGAGAGCGACGAAGAAAAATCCCTATAAATTCCTCCTGGAAGGAAGTGGTACCATTCTCTGAAACTATTCCAATCAATA  
\*\*\*\*\*  
3' end AAAAAAAAAAAAAAAAAAAAAAAAAAAAAAAAAAATTCCTCCTGGAAGTGGTACCATTCTCTGAAACTATTCCAATCAATA

pWLE30. 5a

5' end CTTGTGAAAAGGTTTAATACTTCTCTTTAAAAACAAAATGCAGATCTCTAGAAGCTGGGTACCAGCTGCTAGCAAGCTAGCTTGC  
\*\*\*\*\*  
gg\_chr2 - CTTGTGAAAAGGTTTAATACTTCTCTTTAAAAACAAAATGCTTACTCTGAGTTTGGCAAGTCTGTACAGTAGTGAATCTGCCC  
\*\*\*\*\*  
3' end AAAAAAAAAAAAAAAAAAAAAAAAAAAAAAAAAATTAATACTTCTCTTTAAAAACAAAATGCTTACTCTGAGTTTGGCAAGTCTGTACAGTAGTGAATCTGCCC

pWLE34. 2a

5' end CTGGACAGGCTGGAGAAGTGGGCCCATGAAAGCCTAATGAGGAATTCACAACCCCTTCATGCTAAAACTCTCAATAAATTAGGT  
\*\*\*\*\*  
gg\_chr1 + CTGGACAGGCTGGAGAAGTGGGCCCATGAAAGCCTAATGAGGTTCACAACCCCTTCATGCTAAAACTCTCAATAAATTAGGT  
\*\*\*\*\*  
3' end AAAAAAAAAAAAAAAAAAAAAAAAAAAAAAAAAGAAAGCCTAATGAGGTTCACAACCCCTTCATGCTAAAACTCTCAATAAATTAGGT

pWLE34. 3a

5' end TGTGGAAGTTCTGGCCAGGGCAATCAGGCAGGAGAAGGAAATAAAGGGTATTCATTAGGAAAAGAGGAAGTCAAATTGTCC  
\*\*\*\*\*  
gg\_chr3 - GGTGGTCCCTTGAAGCACTGTCAGGCATGATAGTTAGAAAGAGTCATACTATATCTCAGACTTTCAGATAAATCTTCAGTCTT  
\*\*\*\*\*  
3' end AAAAAAAAAAAAAAAAAAAAAAAAAAAAAAAAAGAAAGAGTCATACTATATCTCAGACTTTCAGATAAATCTTCAGTCTT

pWLE34. 4a

5' end            AAGCTGTTATTCAGTATCTTCAGTGCTTTGAAAGCAATGTTAGTGGATGAATTGGAACCATCATTCTCAGTAA  
\*\*\*\*\*  
gg\_chr1+        AAGCTGTTATTCAGTATCTTCAGTGCTTTGAAAAGCAATGTGATGCGCCAATATCCACAAGCACTACTTTCTC  
\*\*\*\*\*  
3' end            AAAAAAAAAAAAAAAAAAAAAA GAAAAGCAATGTTAGATGCGCCAATATCCACAAGCACTACTTTCTC

pWLE34. 5a

```

5' end      TCAATATCAATATAACAGTAGGTTGAAAGAACAAAGAGATCTCTAGAAGCTGGGTACCAAGCTGCTAGCAAGC
*****
gg_chr5+    TCAATATCAATATAACAGTAGGTTGAAAGACAAAACTGGACTAGTGAAGATTGCCAGTTTGGTGTATT
*****
3' end      AAAAAAAAAAAAAAAAAAAAAAGAAAGAACAAAACTGGACTAGTGAAGATTGCCAGTTTGGTGTATT

```

pWLE34. 7a

5' end                    AAAACTATCTTAATTTCCTTAAAAACACAACA **CAGATCTCTAGAAGCTGGGTACCAGCTGCTAGCAAG**  
 \*\*\*\*\*  
 gg\_chr1 -            AAAACTATCTTAATTTCCTT **AAAAACACACAGCAGCT**CTTGAAACTAGAAGAACACTTTGGTAAGAAA  
 \*\*\*\*\*  
 3' end                    **AAAAAAAAAAAAAAAAAAAAA**CACAACACAGCTCTTGAAACTAGAAGAACACTTTGGTAAGAAA

pWLE35. 1a

[illegible]

pWLE35. 2a

5' end  
AAGTTGCCTACTGAGCATCTGTGCTAAAAATGGTGAAGTATCATGTATACATATGTAAC TAACCCGATCCGAACAA  
\*\*\*\*\*  
gg\_chr1 - AAGTTGCCTACTGAGCATCTGTGCTAAAAATGGTGAAGTATGAGAGACTGTGTATCCATGAAGTCACACTATATTG  
\*\*\*\*\*  
3' end  
AAAAAAAAAAAAAAAAAAAAA TAAAAATGGTGAAGTATGAGAGACTGTGTATCCATGAAGTCACACTATATTG

pWLE35. 3a

5' end  
AAGCCTCACTTCCTAAATCAACAGCATTTTGAGATCTCTAGAAGCTGGGTACCAGCTGCTAGCAAGCTAGCTTGCTAGCGGCCGCGGGGG  
\*\*\*\*\*  
gg\_chr4 - AAGCCTCACTTCCTAAATCAACAGCATTTTGATCCA-TTTTAGAGCACAGAAC-TTAAGACTACATTAGAACAATAAAAAACACTTTA  
\*\*\*\*\*-\*\*\*\*\*-\*\*\*\*\*-\*\*\*\*\*  
3' end  
AAAAAAAAAAAAAAAAAAAAA CAGCATTTTGATCCATTTTAGAGCATAGAACTTATTAAGACTACATTAGAACAATAAAAAACACTTTA

pWLE35. 5a

5' end  
AAAAACATAGGGAAGATTTATTGAATTATGAAAATAATCAGATCTCTAGAAGCTGGGTACCAGCTGCTAGCAAG  
\*\*\*\*\*  
gg\_chrZ + AAAAACATAGGGAAGATTTATTGAATTATGAAAATAATCCAGGACCACAGGCAGGACTTTATTGCCAGCCTGGAA  
\*\*\*\*\*  
3' end  
AAAAAAAAAAAAAAAAAAAAA GAAAATAATCCAGGACCACAGGCAGGACTTTATTGCCAGCCTGGAA

pWLE35. 7a

5' end  
AGAGCAGAGCATCCTGCTCAGGGAGTAGAAAGCCAGTGCCTGAAGGACTTCATGTCCAAACACCAAAGCAATG  
\*\*\*\*\*  
gg\_chr4 - AGAGCAGAGCATCCTGCTCAGGGAGTAGAAAGCCAGTGCCTGGCTCCGTGATGAACAGCTCTGAAGGAAGGAGCA  
\*\*\*\*\*  
3' end  
AAAAAAAAAAAAAAAAAAAAA GAAAGCCAGTGCCTGGCTCCGTGATGAACAGCTCTGAAGGAAGGAGCA

pWLE35. 8a

5' end AACTTTGGTTTGTTCATCTCCCTTAAAAACATATTTGACACATAGGCTCAAAATAAAAGGATGGAGGAAGATCTACCAAG  
\*\*\*\*\*  
gg\_chr2 - AACTTTGGTTTGTTCATCTCCCTTAAAAACATATTTGAGTTATTAATATTTTAGATTATTCTACTGCTTTCATTTC AAC  
\*\*\*\*\*  
3' end AAAAAAAAAAAAAAAAAAAAAAAAAA CATATATTTGAGTTATTAATATTTTAGATTATTCTACTGCTTTCATTTC AAC

pWLE35. 9a

5' end GCTAGCCATGTATTTGGTCTTGCTTGAAAGAGAAGAAATGCAGATCTCTAGAAGCTGGGTACCAGCTGCTAGCAAGCTAGCTTGC  
\*\*\*\*\*  
gg\_chr1 - GCTAGCCATGTATTTGGTCTTGCTTGAAAGAGAAGAAATGCAGTGTATCTCTTTTCACTCTGGTGTCAAGTCTCAAATATTTCTAGCTA  
\*\*\*\*\*  
3' end AAAAAAAAAAAAAAAAAAAAAAAAAA GAAATGCAGTGTATCTCTTTTCACTCTGGTGTCAAGTCTCAAATATTTCTAGCTA

pWLE36. 1a

5' end GTCTAATTAAGGCTGAACAGTTTCAGAAAGATGGTTAAGATCTCTAGAAGCTGGGTACCAGCTGCTAGCAAGCT  
\*\*\*\*\*  
gg\_chr1 - GTCTAATTAAGGCTGAACAGTTTCAGAAAGATGGTTAAGCTTCTGAGAAAGTGATATTCTAAATCAGAAAAGCAG  
\*\*\*\*\*  
3' end AAAAAAAAAAAAAAAAAAAAAAAAAA GAATGGTTAGCTTCTGAGAAAGTGATATTCTAAATCAGAAAAGCAG

pWLE36. 2a

5' end GCATGTGCTCAGGTATACAGCTGACAACTTCTTAAGAGAAAGCCAGATCTCTAGAAGCTGGGTACCAGCTGCTAGCAAG  
\*\*\*\*\*  
gg\_chr12 - GCATGTGCTCAGGTATACAGCTGACAACTTCTTAAGAGAAAGCCAGCACTGGAAAAGGGGAACTCAACTATGGATTTT  
\*\*\*\*\*  
3' end AAAAAAAAAAAAAAAAAAAAAAAAAA GAGAAAGCCAGCACTGGAAAAGGGGAACTCAACTATGGATTTT

pWLE36. 5a

5' end  
TATTTTCCTTTCACAAAGTGTGCAGGTCAAGAAATATATAGT **AGATCTCTAGAAGCTG**  
\*\*\*\*\*  
gg\_chr5 - TATTTTCCTTTCACGAAGTGTGCGGGTCAAGAAATATATAGTATGCCAACACCTTAT  
\*\*\*\*\*  
3' end **AAAAAAAAAAAAAAAAAAAAAAAAAAAA**GAAATATATAGTATGCCAACACCTTAT

pWLE36. 6a

5' end  
TTGCTACCCGTCAAGAGTCAATATGCCCAAAC **GCAGCCAGAGAGAAAGTCGGGTTACCTCAAAGGAAAGCCCA**  
\*\*\*\*\*  
gg\_chr2 + TTGCTACCCGTCAAGAGTCA **AATATGCCCAAACG**GACTACAGCACCTTATCCTTCCATCTCCCCCAGAAAAGA  
\*\*\*\*\*  
3' end **AAAAAAAAAAAAAAAAAAAA**TATGCCCAAACGGACTACAGCACCTTATCCTTCCATCTCCCCCAGAAAAGA

pWLE36. 7a

5' end  
CTGTAGTTCTGTGACAATAGTTGTGAAAGTACTCTGTGG **ACGTATGTTTATTGCGGCACTATTCACAATAGCAA**  
\*\*\*\*\*  
gg\_chr11 + CTGTAGTTCTGTGACAATAGTTGT **GAAAGTACTCTGTGGA**AGTGGTCTTAAACACCAGCAAACACTTTGAGTCA  
\*\*\*\*\*  
3' end **AAAAAAAAAAAAAAAAAAAA**GAAAGTACTCTGTGGAAGTGGTCTTAAACACCAGCAAACACTTTGAGTCA

pWLE36. 8a

5' end  
GCTCTATCAGAGTTGAAGCAATTAACCAAGTATAAC **CTGGCAAACCGAATCCAGCAGCACATCAAAAACTTATCCA**  
\*\*\*\*\*  
gg\_chr7 + GCTCTATCAGAGTTGAAGCAATT **AAAAAACCAAGTATAAC**ATAACCAAGTTGAATATATGTAGCATACATTGCTCTATTCTT  
\*\*\*\*\*  
3' end **AAAAAAAAAAAAAAAAAAAA**CCAAGTATAACATAACCAAGTTGAATATATGTAGCATACATTGCTCTATTCTT

pWLE36. 9a

5' end  
GACCCAGATTTTCAGTTCCTGTATAAGAAGTTCAACTCTAAAACGCAGAGCGCTCTCCTCCTC  
\*\*\*\*\*  
gg\_chr2 + GACCCAGATTTTCAGTTCCTGTATAAAGAAAGTTCAGAGCAGTAGATTATAAAGTCTTTACCTACCA  
\*\*\*\*\*  
3' end  
AAAAAAAAAAAAAAAAAAAAAAAAAAGAAAGTTCAGAGCAGTAGATTATAAAGTCTTTACCTACCA

pWLE36. 10a

5' end  
GTAGGTTTGCCTTGTATAAGGCATGATCAAGAACTAAGGCTCAAGATCTCTAGAAGCTGGGTACCAGCTGCTAGCAAGCTAGCT  
\*\*\*\*\*  
gg\_chr1 - GTAGGTTTGCCTTGTATAAGGCATGATCAAGAACTAAGGCTCAAGCTTGTGTTAGGGTTACTTTCTTAGATAAAAATC  
\*\*\*\*\*  
3' end  
AAAAAAAAAAAAAAAAAAAAAAAAAAGAACTAAGGCTCAAGCTTAAAGACCTTTGCTGAGCAAGAAGGTGAATGGTCACA

pWLE36. 12a

5' end  
GGGATCAGTAACCAAAACACAACCTCCTACCAAAAACAATATGATCGAGATCTCTAGAAGCTGGGTACCAGCTGCTAGCAAGCTAGCTTGCTA  
\*\*\*\*\*  
gg\_chr1 - GGGATCAGTAACCAAAACACAACCTCCTACCAAAACCAATATGATCTTGTGTAGAAGATACTAAGTGTGCACCTCACTGTGTAACCTGAGC  
\*\*\*\*\*  
3' end  
AAAAAAAAAAAAAAAAAAAAAAAAAACAATATGATCTTGTGTAGAAGACTAGGGTGTGCACCTCATTGTGTAACCTGAG

pWLE36. 13a

5' end  
CCAAAGTAGCCAGAAGTCTGCTAGTTTCCTTAGAACAGCAGAGGGGAAGAGATCTCTAGAAGCTGGGTACCAGCTGCTA  
\*\*\*\*\*  
gg\_chr1 + CCAAAGTAGCCAGAAGTCTGCTAGTTTCCTTAGAACAGCAGAGGGGAACAGTCAGATTTAACAGTATTACGTCTCAT  
\*\*\*\*\*  
3' end  
AAAAAAAAAAAAAAAAAAAAAAAAAAGAACAGCAGAGGGGAACAGTCAGATTTAACAGTATTACGTCTCAT

pWLE36. 14a

5' end  
AAAGGTGAAATCTGGTATAATCAACTTGAAAACCAAGTCTGAGATCTCTAGAAGCTGGGTACCAGCTGCTAGCAAGCTAGCT  
\*\*\*\*\*  
gg\_chr1 + AAAGGTGAAATCTGGTATAATCAACTTGAAACCAGCTGTTTCATTTTGAAGGAAAAAAAAATGCAGGTCTATGTGTCAG  
\*\*\*\*\*  
3' end  
AAAAAAAAAAAAAAAAAAAAAAAAAAAAGAAACCAAGTCTGTTTCATTTTGAAGGAAAAAAAAATGCAGGTCTATGTGTCAG

pWLE36. 16a

5' end  
AAATGATTTTATGATTCTATGACAAATTAAGAAAATAATAATAATCCAGATCTCTAGAAGCTGGGTACCAGCTGCTAGC  
\*\*\*\*\*  
gg\_chr2 + AAATGATTTTATGATTCTATGACAAATTAGAAATAATAATAATCCATAAATTGCCACTCATCAAGCAAAGGATGCTTA  
\*\*\*\*\*  
3' end  
AAAAAAAAAAAAAAAAAAAAAAAAAAAAGAAAATAATAATAATCCATAAATTGCCACTCATCAAGCAAAGGATGCTTA

pWLE36. 20a

5' end  
CAATTCAGTTGAAGATTCTAGTCAATTTAAGATCTTTTAGATCTCTAGAAGCTGGGTACCAGCTGCTAGCAAGC  
\*\*\*\*\*  
gg\_chr2 - CAATTCAGTTGAAGATTCTAGTCAATTTAGATCTTTAGCATTATTTTTTCACTTTACAATTATAATCTGTTTAC  
\*\*\*\*\*  
3' end  
AAAAAAAAAAAAAAAAAAAAAAAAAAAAGATCTTTTAGCATTATTTTTTCACTTTACAATTATAATCTGTTTAC

### L1.3 / DT40 Ku70-/- cells

#### p7LE13. 1a

5' end  
ACTGCTTCGTCTAGTAGTTTCTTTATATGTTGTTAAAAATGTATAATGTTGACCCAGCCATCCCATTACTG  
\*\*\*\*\*  
gg\_chr4- ACTGCTTCGTCTAGTAGTTTCTTTATATGTTGTTAAAAATGTATAATGTATTATTCAAGATAAAATACAT  
\*\*\*\*\*  
3' end  
AAAAAAAAAAAAAAAAAAAAAAAAAAAAATGTATAATGTATTATTCAAGATAAAATACAT

#### p7LE13. 2a

5' end  
GATAGAAAAAGTAATTATATGATCTCTAGAAGCTGGGTACCAGCTGCTAGCAAGCTAGCTTGCTAGCGGCCGCGGG  
\*\*\*\*\*  
gg\_chr2+ GATAGAAAAAGTAATTATATCTCTCACTGTATTCTGCTGCAGTGCTTCACTGATGCTGGTCTCAGTCCCTGTATGT  
\*\*\*\*\*  
3' end  
AAAGAAAAAGTAATTATATCTCTCACTGTATTCTGCTGCAGTGCTTCA

#### p7LE13. 3a

5' end  
CTGTCAAAATAACGAATTTACGAGATCTCTAGAAGCTGGGTACCAGCTGCTAGCAAGC  
\*\*\*\*\*  
gg\_chr18- CTGTCAAAATAACGAATTTACATCATAAATGCACGGGCTCCCTTTTAAAGGCCTCTT  
\*\*\*\*\*  
3' end  
AAAAAAAATAACGAATTTACATCATAAATGCACGGGCTCCCTTTTAAAGGCCTCTT

#### p7LE13. 5a

5' end  
CTCATTATTTAGTTTGCATACGCTTACAGTCAAAAAATATAAAACGAGATCTCTAGAAGCTGGGTACCAGCTGCTAGCAAGCTAGCT  
\*\*\*\*\*  
gg\_chr2- CTCATTATTTAGTTTGCATACGCTTACAGTCAAAAAATATAAAAGCATTTTCATTGTGAACACTAACCATTGTGTTGCGTGAAAACC  
\*\*\*\*\*  
3' end  
AAAAAAAAAAAAAAAAAAAAAAAAAAAAATATAAAAGCATTTTCATTGTGAACACTAACCATTGTGTTGCGTGAAAACC

[illegible]

5' end CTAGCCCAGGAGATCTGACAGAGACATATAGAAATTAGTAGCTGTACAAAGCTACAGTAACCAAAACAGCATGGT  
\*\*\*\*\*  
gg\_chr8 + CTAGCCCAGGAGATCTGACAGAGACATATAGAAATTAGTAGCTGTGAAACTGTGATCAAGCTGCTAAGAAGTTGAA  
\*\*\*\*\*  
3' end AAAAAAAAAAAAAAAAAAAAAAAAAAAGAAATTAGTAGCTGGAACTGTGATCAAGC

5' end ACATAAAACAATAGAAGGACAGTCTTGTCAAAACAATTGATTTAGCAAAAGTCTCAGGATACAAAATCAATGTACAAA  
\*\*\*\*\*  
gg\_chr10- ACATAAAACAATAGAAGGACAGTCTTGTCAAACAAGTCTGATTGACATTTTGATGACAGGTGTGGCTGGGGATTTATTC  
\*\*\*\*\*  
3' end AAAAAAAAAAAAAAAAAAAAAAAAAAAAAAACAACCTTGATTGACATTTTGATGACAGGTGTGGCTGGGGATTTATTC

[illegible]

p7LE14. 4a

5' end  
ATCAATTAATAACATAAAGGGTTGATGAAAGTAACTGAGATCTCTAGAAGCTGGGTACCAGCTGCTAGCAAG  
\*\*\*\*\*  
gg\_chr11- ATCAATTAATAACATAAAGGGTTGATGAAAGTAACTGAGATGCTTATGTGATTTGTGTTAATTTTTATAAAAT  
\*\*\*\*\*  
3' end  
AAAAAAAAAAAAAAAAAAAAAAAAAGAAAGTAACTGAGATGCTTATGTGATTTGTGTTAATTTTTATAAAAT

p7LE14. 5a

5' end  
CACATAAACACAACAATTTCATAGCTCTCCAAAAATCAAATGAACCTATGGAACCAAAAA  
\*\*\*\*\*  
gg\_chr 3 + CACATAAACACAACAATTTCATAGCGCTCCAAAAATCAGATGAACCAAGAGATGTACTGC  
\*\*\*\*\*  
3' end  
AAAAAAAAAAAAAAAAAAAAAAAAATCAAATGAACCAAGAGATGTACTGC

p7LE14. 6a

5' end  
TTAGGAGAGAATTTGTATTCTGGAATCAAAGACTAGAATCCAGAACTAGAAATACCATTGACC  
\*\*\*\*\*  
gg\_chr 9 - TTAGGAGAGAATTTGTATTCTGGAATCAAAGACTAGAATCCATTAAAGAGCTTGGGATGAAGAC  
\*\*\*\*\*  
3' end  
AAAAAAAAAAAAAAAAAAAAAAAAAGACTAGAATCCATTAAAGAGCTTGGGATGAAGAC

p7LE15. 1a

5' end  
CCACCAACAAATACAGAGAAACATATTCCATTTATGAAAAGCTGTGGAAGCTCAAGGAATAAAGAGGACACAAACAAATGGAAG  
\*\*\*\*\*  
gg\_chr2- CCACCAACAAATACAGAGAAACATATTCCATTTATGAAAAGCTGTGGAATTTGAAAATCTTCTCAAAACAGTAGCATTGTAT  
\*\*\*\*\*  
3' end  
AAAAAAAAAAAAAAAAAAAAAAAAAGAAAAGCTGTGGAATTTGAAAATCTTCTCAAAACAGTAGCATTGTAT

p7LE15. 2a

5' end

TCCAGAGGTGCTCTCTGTTGATATATGGCCCTTGA AAAATGACAGATAGTCTTTTATTGCCGATCCCTCAGAAGAACTCGTCAAGAAGG  
\*\*\*\*\*

gg\_chr12+

TCCAGAGGTGCTCTCTGTTGATTATGGCCTTGA<sup>AAAAA</sup>TGACAGATAAATTTTAGTGTTT<sup>AGGA</sup>ATTGCTGCTGGCTGTTACTCAGTCT  
\*\*\*\*\*

3' end

AAAAAAAAAAAAAAAAAAAAAAAAAAAAGAAAAATGACAGATAAATTTAGTGTTTCAGGAATTGCTGCTGGCTGTTACTCAGTCT

p7LE15. 3a

5' end

TGTGTTGATTGATCAAATTCCTCAGCTACAAAAATCTATTTTTTACTTTATAGACAAGCAAATGTTGAGAGATTTTGTCAACCACGAGGC  
 \*\*\*\*\*

gg\_chr2-

TGTTTGATTGATCAAATTCTCAGCTACAAAGATCTATTTTAAACATAGTTACCACCACTAGCTATGCATTTTTGCCAGTGATGAACAA  
\*\*\*\*\*

3' end

AAAAAAAAAAAAAAAAAAAAAAAAAAAAAAAAAAAAAAAAA TCTATTTTAAACATAGTTACCACCCTAGCTATGCATTTTGGCAGTGATGAACAA

p7LE15. 4a

5' end

GGTTAAAGTCCATTCCAGAAAAGTGCTAGACTTGATTAAAACTCCA**GAAGAGGGAATATC**ACTCTGGGACTGTGGTGGGT**CGGGGAGGGGG**  
\*\*\*\*\*

gg\_chr1+

GGTAAAGTCCATTCCAGAAAAGTGCTAGACTTGATTAAAAACTCCAGAGAAAAGAATTGCTGTTTCCTGTATAAGTCTATTCCAATTCATAATGG  
\*\*\*\*\*

3' end

AAAAAAAAAAAAAAAAAAAAAAAAAAAAAAAAAAAAAAAACTTCCAGAGAAAAGAATTTGCTGTTTCCTGTATAAGTCTATTCCAATTCATAATGG

p7LE15. 5a

5' end

GCAGAAAA TCCCTGTACATT CAGACAAGT AACAGAAATCA CAGATCTCTAGAAGCTGGGTACCAGC  
\*\*\*\*\*

gg\_chr4-

GCAGAAAATCCCCTGTACATTAGACAAGTAAC**AAGAAATCACAT**GCACCTGTAAATGACAGTAAATTC  
\*\*\*\*\*

3' end

[illegible]

p7LE15. 6a

5' end GCATGTAATTTGGGTTAAGAAAAATAAGCGAGA**AACAACGACCCAACACCCGTGCGT**TTTATTCTG  
\*\*\*\*\*  
gg\_chr7- GCATGTAATTTGGGTT**AAGAAAAATAAGCGAGAA**TAATATTTTATGTCATCTCCTGTCAGTGTGTA  
\*\*\*\*\*  
3' end **AAAAAAAAAAAAAAAA****A**GAAAAATAAGCGAGAAATAATATTTTATGTCATCTCCTGTCAGTGTGTA

p7LE16. 1a

5' end GGGTTTACCATTAAGTGGAGAAGTAACAGCAAAAGATGATTTCA**ATAAAGAGGACACAACAAATGGAAGAACATTCCATG**  
\*\*\*\*\*  
gg\_chr 2 - GGGTTTACCATTAAGTGGAGAAGTAACAGCA**AAAGATGATTTCA**AGACCAAAATTTCTAATAGAACTCTCCTTTTCCAGAGG  
\*\*\*\*\*  
3' end **AAAAAAAAAAAAAAAAAAAAAAAAAAAAA****A**GATGATTTCAAGACCAAAATTTCTAATAGAACTCTCCTTTTCCAGAGG

p7LE16. 2a

5' end TTTAGACAACTTGGTCAATAAAAAGTTTTTAAATATTTCCA**AGATCTCTAGAAGCTGGGTACCAGCTGCTAGC**  
\*\*\*\*\*  
gg\_chr 5 + TTTAGACAACTTGGTCAATAAAAAGTTTT**AAAAATATTCCA**AAGGATTAGGATTTACCTGCTGAAAACATGCTT  
\*\*\*\*\*  
3' end **AAAAAAAAAAAAAAAAAAAAAAAAAAAAA****A**TATTCAAAGGATTAGGATTTACCTGCTGAAAACATGCTT

p7LE16. 4a

5' end GACAAGAGCTCTGCATTATTATTTGGCAGTAAAAAGTATTTCC**TGGGGTCGGGGGAGGGGGAGGGATAGCATTGGGAGATAT**  
\*\*\*\*\*  
gg\_chr6+ GACAAGAGCTCTGCATTATTATTTGGCAGT**AAAAAGTATTTCCA**TAGCTGAAAAGGCTTTACTTGCTGGGTCTGTGTTCTATT  
\*\*\*\*\*  
3' end **AAAAAAAAAAAAAAAAAAAAAAAAAAAAA****A**GTATTTCCATAGCTGAAAAGGCTTTACTTGCTGGGTCTGTGTTCTATT

[illegible]

```

5' end      CCCTTAATTTGCAATGCTAAATTAATTAGATAGATCTCTAGAAAGCTGGGTACCAGCTGCTAG
            *****
gg_chr2 -   CCCTTAATTTGCAATGCTAAATTAATTAGATGAACAGTAAATCCCCATGGAATTTTCATATG
            *****
3' end      AAAAAAAAAAAAAAAAAATAAATTAATTAGATGAACAGTAAATCCCCATGGAATTTTCATATG

```

5' end  
 TAATITTTTAGCAAAATGGTTTCATTGTGTAAGGACAGGTAAGATCTCTAGAAGCTGGGTACCAGCTGCTAGCAAGCTAGC  
 \*\*\*\*\*  
 gg\_chr1 +  
 TAATITTTTAGCAAAATGGTTTCATTGTGTAAGGACAGGTAATCTCAGCGACACATGTCAGCTGTCTCCTGCTCTCCGCTGA  
 \*\*\*\*\*  
 3' end  
 AAAAAAAAAAAAAAAAAAAAAAAAAAAAAAAGGACAGGTAATCTCAGCGACACATGTCAGCTGTCTCCTGCTCTCCGCTGA

```

5' end      CTTCTGATTTGCAGTGTTTAAAATAAAGGGCAACAGACCGATCCCCTCAGAAGAACTCGTCAAG
*****
gg_chr3 -   CTTCTGATTTGCAGTGTTTAAAATAAAGGGCAACAGACACTTGATTGAGATAACCCAGCACAG
*****
3' end      AAAAAAAAAAAAAAAAAAATAAATAAAGGGCAACAGACACTTGATTGAGATAACCCAGCACAG

```



### L1.3 / HeLa-RC cells

pHLE1. 2a

5' end TTGTAATATGCCACCTTTATTTTATAAGAGTATTTACGAGATCTCTAGAAGCTGGGTACCAGCTGCTAGCAAGCTAGCTTGCTAG  
\*\*\*\*\*  
hs\_chr4 - TTGTAATATGCCACCTTTATTTTATAAGAGTATTTACAGAGTATTTAAGTCGTTTAAAGTCGTTATCAATCATTGAGTTGATATAA  
\*\*\*\*\*  
3' end AAAAAAAAAAAAAAAAAAAAAAAAAAAGAGTATTTACACAGAAATTTGCAGTTTAAAGTCGTTATCAATCATTGAGTTGATATAA

pHLE1. 4a

5' end TCCATTTTGTCCAAAAGCAAAACAAAACGAACCTCAAGTTAAAAAAGTCTGGATTAAAGATTAAACGTTAAACCTAAACCATAA  
\*\*\*\*\*  
hs\_ch2+ TCCATTTTGTCCAAAAGCAAAACAAAACGAACCTCAAGTTAAAAAAGTCTCAAAATTTATAAAGGAGAACACCAATATTATTTCATG  
\*\*\*\*\*  
3' end GCTGCAATAAACAGTTAACACAAAAAAGTCAAAATTTATAAAGGAGAACACCAATATTATTTCATG

pHLE1.5a

[illegible]

pHLE1. 6a

5' end GCCACTTCAGTTGTTTTGTGGAAATACCTAATGCTAGATGACACATTAGTGGTGACAGCGCACCCAGCATGCCACATG  
\*\*\*\*\*  
hs\_chr17 + GCTGTGCCACTTCAGTTGTTTTGTGGAAACAAAACACACCA AAAACAAAAACAAACAGATGCCTGGACACTGTATTTTC  
\*\*\*\*\*  
3' end AAAAAAAAAAAAAAAAAAAAAAAAAAAAAAAAAAAAAAAAAAAAAAC AAACAAAAACAGATGCCTGGACACTGTATTTTC

pHLE2. 3a

5' end  
hs\_chr2+  
GGCGCGGTGGCTCACGCCTGTGGTCAAAATGTGGCACATATACCCATGGAATACTATGCAGCCATAAAAAAT  
\*\*\*\*\*  
GGCGCGGTGGCTCACGCCTGTAATCCCAACACTTTGGGAGGCCAAGGTGGGTGGATCACAAGGTCAGGAGTTC  
116533960  
hs\_chr3 +  
TTCTAATTATGATGTAATCCATGTCTCAATAAAAAACACTCACATGCTTCCAGAGGTTAAAAATGGGAGGAA  
\*\*\*\*\*  
3' end  
AAAAAAAAAAAAAAAAAAAAAAAAAAAAAAACACTCACATGCTTCCAGAGGTTAAAAATGGGAGGAA  
(comment)  
pLEmH  
TCCAACAATGATAGACTGGATTAAGAAAATGTGGCACATATACCCATGGAATACTATGCAGCCATAAAAAAT  
\*\*\*\*\*  
5' end  
GGCGCGGTGGCTCACGCCTGTGGTCAAAATGTGGCACATATACCCATGGAATACTATGCAGCCATAAAAAAT  
\*\*\*\*\*  
hs\_chr2+  
GGCGCGGTGGCTCACGCCTGTAATCCCAACACTTTGGGAGGCCAAGGTGGGTGGATCACAAGGTCAGGAGTTC  
\*\*\*\*\*  
hs\_chr3+  
GGATGGAGGTTACAAGGAAATGGTCAAACTTGAATGAACTAGCCAAATATCCTTTTGT  
116534108

pHLE2. 5a

5' end  
GTAATTAATATAACCTTTTCATCTTAAGGGAGGAAAAATGGAAGCTCGGGGGAGGGGGAGGGATAGCATTGGGAGATATACCTAATGCTAGATGACA  
\*\*\*\*\*  
hs\_chr2 -  
GTAATTAATATAACCTTTTCATCTTAAGGGAGGGAAATGGAAGCTAATTATTCAAAATTTAAACGTGTATATCCTTTATTTTAAATTTGTACTATT  
\*\*\*\*\*  
3' end  
AAAAAAAAAAAAAAAAAAAAAAAAAAAAAAGAAATGGAAGCTAATTATTCAAAATTTAAACGTGTATATCCTTTATTTTAAATTTGTACTATT

pHLE2. 9a

5' end  
ATAAAATGTTAGTGTAACACATTTCATTTTCCAATGGCGAACCAACACCGCATATTCTCACTCATAGGTGGGAATTGAACAATGAGAT  
\*\*\*\*\*  
hs\_chr4 -  
ATAAAATGTTAGTGTAACACATTTCATTTTCCAATGGCGATCAAGATTCAAGATAAGGAAATAATTGCTTGTAATTCATTAGTAA  
\*\*\*\*\*  
3' end  
AAAAAAAAAAAAAAAAAAAAAAAAAAAAAAGATTCAAGATAAGGAAATAATTGCTTGTAATTCATTAGTAA

pHLE2. 10a

5' end  
GCATATATAGGTGGTAAACTGTAAAGAAAAGCACATTGTTATAACAACAATGATAGACTGGATTAGGAAATGTGGCACATATACCCATGGA  
\*\*\*\*\*  
hs\_chr6 -  
GCATATATAGGTGGTAAACTGTAAAGAAAAGCACATTGTTATAGTAAATCAGAATCATATAGAGATGAGAACAGATCATTATCCGGGAG  
\*\*\*\*\*  
3' end  
AAAAAAAAAAAAAAAAAAAAAAAAAAAAAATAAAATCAGAATCATATAGAGATGAGAACAGATCATTATCCGGGAG

pHLE2. 11a

5' end TATAATAATAATAATCATGAACTTGGCACTTTAGAATAACTGGCTAGCCATATGTAGAAAGCTGAAACTGGACCCCTTCCTTACACC  
\*\*\*\*\*  
hs\_chr12 + TATAATAATAATAATCATGAACCTTGGCACTTTAGAAAGCTGAAACTGGACCCCTTCCTTACACC  
\*\*\*\*\*  
3' end AAAAAAAAAAAAAAAAAAAAAAAAAAAAAAAAAAAGAAATAGCCTAAGACTTGAAAGCTTGGCTTGGCGTCAGGTAGTCTCAGCTCAAATT

pHLE3. 5a

5' end TTTGAGCTTATTTTAGTTACCTTTTATCTTTTGAAAAGACATTATCATGCTGCTATAAAGACACATGCACAGTATGTTTATTGCGGCACATTT  
\*\*\*\*\*  
hs\_chr5 + TTTGAGCTTATTTTAGTTACCTTTTATCTTTTGAAAAGACATTATTTTATGTACATGTATATCTAATTCATTGCACAAATCCTTACCTCT  
\*\*\*\*\*  
3' end AAAAAAAAAAAAAAAAAAAAAAAAAAAAAAAAAATATTTTATGTACATGTATATCTAATTCATTGCACAAATCCTTACCTCT

pHLE3. 9a

5' end CGTGTTTTCTTAAATTAGTCAATCTATAACCCGCAAGGAAATCTAAAGAACTCTACAATGAAGTTAAACAAATTTACAAGAAAAAACA  
\*\*\*\*\*  
hs\_chr7 - CGTGTTTTCTTAAATTAGTCAATCTATAACCCGCAAGGAAAGTCTAAGAAAGTAAATGCTTGTGGACTTTAATGAAAGTCTAGTTCCGGCTG  
\*\*\*\*\*  
3' end AAAAAAAAAAAAAAAAAAAAAAAAAAAAAAAAAAGAAATCTAAAAGATAATGCTTGTGGACTTTAATGAAAGTCTAGTTCCGGCTG

pHLE4. 4a

5' end CCTGGCACTTAGAAGGGAAGAATCTTTGCAACACAAATGACGATTAAAGAGGGGGAGGGATAGCATTGGGAGATATACCTAATGCTAGATGACACATT  
\*\*\*\*\*  
hs\_chr15 + CCTGGCACTTAGAAGGGAAGAATCTTTGCAACACAAATGACGATTAAAGAAATAACAGTGAAAAGTCAGCAGACATTCACAAAGAGGGAAGTCATCTTCA  
\*\*\*\*\*  
3' end AAAAAAAAAAAAAAAAAAAAAAAAAAAAAAAAAAGAAATAACAGTGAAAAGTCAGCAGACATTCACAAAGAGGGAAGTCATCTTCA

5' end CACTCCAGCCTGGGTGACAGAGCTAGACTCCATTTCAAAAAAAAAAAGCCATTGCCAGGCTTGCTTAGTAAACAAGCAGCGGGAAGC  
\*\*\*\*\*  
hs\_UCSC\_chr5 + CACTCCAGCCTGGGTGACAGAGCTAGACTCCATTTCAAAAAAAAAAAGGGAATTGTGCCAATGACCAATGGTTGGGATTTTTACTT  
\*\*\*\*\*  
3' end AAAAAAAAAAAAAAAAAAAAAAAAAAAAAAAAAA CAAAAAAAAAAAAA-GGGAATTGTGCCAATGACCAATGGTTGGGATTTTTACTT

[illegible]

5' end CTATGAGAAAAACAAGAGATAGGAAAAAGAGAGCTCTCCAAGCAATTAGTAACTATCGCAAGAACAAAAACCAACCCGCATATTCTCACTCATAGGTG  
\*\*\*\*\*  
hs\_chr20 - CTATGAGAAAAACAAGAGATAGGAAAAAGAGAGCTCTCCAAGCAATTAAAACTATTAATTTCCAGATTTAATTTAGCAATAAATGGACATTGCTAAACAC  
\*\*\*\*\*  
3' end AAAAAAAAAAAAAAAAAAAAAAAAAAAAAAAAAAAAAAAAAAAAAAACTATTAAATTTCCAGATTTAATTTAGCAATAAATGGACATTGCTAAACAC

5' end GAGACCTTGTGCCAGGGGAACCTCTGTTTATAAACTGTCAGATCGGCTTCAGACGATCAAATTACTCTGAGCTACGGGAG  
\*\*\*\*\*  
hs\_chr21 - GAGACCTTGTGCCAGGGGAACCTCTGTTTATAAACTGTCAGATCTCATGAGACATTTCACTACCACGAGAACGATATGG  
\*\*\*\*\*  
3' end AAAAAAAAAAAAAAAAAAAAAAAAAAATAAACTGTCAGATCTCATGAGACATTTCACTACCACGAGAACGATATGG

pHLE5. 8a

[illegible]

pHLE5. 9a

[illegible]

pHLE5. 10a

```

5' end      GGTGAATTCTCAAGATGGCATATTTCAATATACTAAACAGAAGAACTCGTCAAGAAGGCGATAGAAGGCCGATGCCTGCGAATCGGGAG
            *****
hs_chr1-    GGTGAATTCTCAAGATGGCATATTTCAATATACTAAATATAATAATTGAAGAGGAAATATTTAATAATTAATAACAAAAGCTATAT
            ****
3' end      AAAAAAAAAAAAAAAAAAAAAAAAAAAAAAAAAAAAAAATAATTGAAGAGGAAATATTTAATAATTAATAACAAAAGCTATAT

```

pHLE5. 14a

5' end GCCAGTGTCCAGGAACACAGAGACAACGTGCTGTTTTAAACATTTTGCATGGATGAAATGGAAACCATCATCTCAGTAAACTATCGCAAGAACA  
\*\*\*\*\*  
hs\_chr13 - GCCAGTGTCCAGGAACACAGAGACAACGTGCTGTTTTAAACATTTTGCATGGATGAAATGGAAACCATCATCTCAGTAAACTATCGCAAGAACA  
\*\*\*\*\*  
3' end AAAAAAAAAAAAAAAAAAAAAAAAAAAAAAAAAAATTTTGCATGGATGAAATGGAAACCATCATCTCAGTAAACTATCGCAAGAACA

pHLE5. 15a

5' end                   ATAACAGTCTCTCAGACAGCAACAATTAAGATTCAAGATTAAAGTTCGGGGGAGGGGGAGGGATAGCATTGGGAGATATACCTAATGCTAGAT  
\*\*\*\*\*  
hs\_chrb -           ATAACAGTCTCTCAGACAGCAACAATTAAGATTCAAGATTAAAGAAACACTCAACACTACACAGCTACATGGAAATTAAACAACCTGCTCCTGAA  
\*\*\*\*\*  
3' end                   AAAAAAAAAAAAAAAAAAAAAAAAAAAAAAAAAAAAAAAAAAGAAACACTCAACACTACACAGCTACATGGAAATTAAACAACCTGCTCCTGAA

## pHLE5. 20b

[illegible]

pHLE5. 21 a

[illegible]

pHLE6. 2a

[illegible]

pHLE6. 7a

5' end

CAGAATGATATGACTTGAAATATAACTTATTATGAACATACTTGAAAAGAGAAATGCAATCAAAACCACTATGAGATATCATCTCACCA  
\*\*\*\*\*

hs\_chr18 +

CAGAATGATATGACTTGAAATATAACTTATTATGAACATACTTGTAAAGAGAAAAAAATCCACCAGCAAAAAGTAATGTTAAAAATTATCAC  
\*\*\*\*\*

3' end

AAAAAAAAAAAAAAAAAAAAAAAAAAAAAAAAAAAAAGAAAAAAAAATCCACCAGCAAAAAGTAATGTTAAAATTATCAC

pHLE6. 11a

5' end

TCTGGAATTACCACTGGGTCAAGGAAGCAATTAAGAAGGAAATTAACACCTTCTGGGACTGTGGTGGGTGGGGGAGGGGAGGGATAG  
\*\*\*\*\*

hs\_chr7 +

TCTGAATTACCACTGGGTCAAGGAAGCAATTAGAAGGAAATT**AAAACCTCTT**TGGAACAATAATAATGAAACACAACATACCAAAACC  
\*\*\*\*\*

3' end

AAAAAAAAAAAAAAAAAAAAAAAAAAAAAAAAAAAAACCTTCTTGGAACAAATAATAATGAAAACACAACATACC AAAACC

pHLE6. 18a

5' end

TACCAAAATATTTGAATTATTATGATCCCTTAATGCCAACACTTAAAAATTAGATATACCTAATGCTAGATGACACATTAGTGGGTGCAGCGC  
\*\*\*\*\*

hs\_chr5 -

TACCAAAATATTTGAATTATTATGATCCCTTAATGCCAACACTTAAATTCCTTTTATGATAAGTCTGCAACATCTACAAAGTAAGTATC  
\*\*\*\*\*

3' end

[illegible]

pHLE7. 3a

5' end

CAAAGTTCATGTTTTCATATCCAGAATACAGTAAGAAATTGTGGTAATAGAAAGCTGAAACTGGACCCCTTCTT  
\*\*\*\*\*

hs\_chr9 -

CAAAGTTCATGTTTTCATATCCAGAATACAGT**AAGAAATTGTGGT**AAAACTAAAATAAAAAATAAAATAATA  
\*\*\*\*\*

3' end

[illegible]

5' end            ACAATCCCCGACTTCTTGTTGTTTTAAATTAGTTTTAAATTTACATATTCCTACTCATAGGTGGGAATTGAACAATGAGAT  
\*\*\*\*\*  
hs\_chrx -        ACAATCCCCGACTTCTTGTTGTTTTAAATTAGTTTTTAAATCAAAATGCATACTTGCGAGTTTTAAAAATCAAATAGTTCTCCA  
\*\*\*\*\*  
3' end            AAAAAAAAAAAAAAAAAAAAAAAAAAAAAAAAAAATAAAATCAAAATGCATACTTGCGAGTTTTAAAAATCAAATAGTTCTCCA

```

5' end      TGCTCTGATGGAGCTGGGCAAGTGAATTGAAATCTTGAGATCTCTAGAAGCTGGGTACCAGCTGCTAGCAAGCTAGCTT
*****
hs_chro6 -  TGCTCTGATGGAGCTGGGCAAGTGAATTGAAAGTCTTCTGAAAAGGATCCCCATTTAGATGATGCCATTAATATGTT
*****
3' end      AAAAAAAAAAAAAAAAAAAAAAAAAAAAAGAAATCTTCTGAAAAGGATCCCCATTTAGATGATGCCATTAATATGTT

```

5' end  
HLE7. 30aL1. 3Ct-R1  
hs\_chr6 -  
3' end

AGCATGCCCCCTGCGCAAGGATGACACGCAAAATTCGTGAAGCGTTC CATATTTTTCACACGTA TGTTATTGCGGCACATTTCACAATAGCAAGACT  
CATAATAAAATACTAAAAATCCATAATCGTCAATTGCTTCTGGTTTCTAAAAATTA GTGCTCGCTTCGGCAGCACATATACTAAAATTGGAACGATAC  
\*\*\*\*\*  
CATAATAAAATACTAAAAATCCATAATCGTCAATTGCTTCTGGTTTCTAAAAATTAAGGCTATTTTCTTAATAGGTGCATTCATAACCCAGTCATCA  
\*\*\*\*\*  
AAAAAAAAAAAAAAAAAAAAAAAAAAAAAAAAAAAAAAAAAAAAAAAAAAAAAAAAAATAAAAATTATAGGCTATTTTCTTAATAGGTGCATTCATAACCCAGTCATCA

[illegible]

5' end AGATCAGAGCTGCTGCTGACTGCTAGTCAAAATGTGACATGATCAA~~AAAAACCCCTTCAAAAAATCAATGAATCCAGGAGCTGGTTTTTGA~~  
\*\*\*\*\*  
hs\_chr13 - AGATCAGAGCTGCTGCTGACTGCTAGTCAAAATGTGACATGATCA~~G~~AAATAAACCTTTGTTGATGzTCAGATGTCAAAGCCATTGAGTTTT  
\*\*\*\*\*  
3' end ~~AAAAAAAAAAAAAAAAAAAAAAAAAAAAAAAAAAAAAAAAA~~GAAATAAACCTTTGTTGATGTCAGATGTCAAAGCCATTGAGTTTT

5' end AAGGAAT AATTGGATAATGGTATTGGTCATACTTTTAAAGTATGGCACATGTATACATATGTAACTAACCCGATCCGAACAAACGACCCAA  
\*\*\*\*\*  
hs\_chr5 - AAGGAAT AATTGGATAATGGTATTGGTCATACTTTTAAAGTATCTGTTAGAAAGATATAGGATGCAGAACATCTAGGATTGCTGAAAG  
\*\*\*\*\*  
3' end AAAAAAAAAAAAAAAAAAAAAAAAAAAAAAAAAAAAAAAAAAAGTATCTGTTAGAAAGATATAGGATGCAGAACATCTAGGATTGCTGAAAG

[illegible][illegible]

pHLE8. 24b

5' end TTGTAGGCAAGTTGCAAAGTGCAATTAACAGATTAATGAACAGACGCACATATACACCATGGAATACTATGCAGCCATAAAAAATGATGAG  
\*\*\*\*\*  
hs\_chr11 - TTGTAGGCAAGTTGCAAAGTGCAATTAACAGATTAATGAACAGACGAAAGATGTGATACTTTTATTTAACTGGTCTTAATCACCTCCATT  
\*\*\*\*\*  
3' end AAAAAAAAAAAAAAAAAAAAAAAAAAAAAAAAAAAAGAAAGATGTGATACTTTTATTTAACTGGTCTTAATCACCTCCATT

pHLE8. 30a

hs\_chr1 + AAAGGATTATAATTCATGCTACTATAGAGACACATGCACACAAATGTTTATTGTGGCACTATTCACAATAGCAAAGACTTGGAACCAACC  
\*\*\*\*\*  
5' end TAGGAGTTGCCACACTC-TTTTTTTTTTTTTTTTGAATGAAATGTTTATTGTGGCACTATTCACAATAGCAAAGACTTGGAACCAACC  
\*\*\*\*\*  
hs\_chr12 - TAGGAGTTGCCACACTCTTTTTTTTTTTTTTTTGAATGAAATGTTTATTGTGGCACTATTCACAATAGCAAAGACTTGGAACCAACC  
\*\*\*\*\*  
3' end AAAAAAAAAAAAAAAAAAAAAAAAAAAAAAAAAAAAGAAATGAAATCTCTCTTTGTCCCCAGTCTGGAGTGCAATGGGGCAATCTCTGC

## ZfL2-1 / DT40 WT cells

### pWC1. 1a

5' end AGAGACAGAGATAGGCAGCATACTGCCTTCTACAAAGGAACAAA**GTTGCATCAATCTTTAGTGATTTC**  
\*\*\*\*\*  
gg\_chr4 + AGAGACAGAGATAGGCAGCATACTGCCTTCTACAAAG**GAACAA**ACAAAAACATAAACACAAATCCCA  
\*\*\*\*\*  
3' end **CTGAATTGAATTGAATTGAATTGAATTGAATTGA**ACAAACAAAAACATAAACACAAATCCCA

### pWC1. 2a

5' end ACTCAATTTTAAAGGAAGTATAGTGAATGGAGAGACAGATTG**ACCTGGGGATACTCATCCCGAGGTCTCAGATTAGCGGAGTCACT**  
\*\*\*\*\*  
gg\_chr 3 - ACTCAATTTTAAAGGAAGTATAGTGAATGGAGAGACAG**ATTGA**AAGCTTCAGAGAATGAAATACTCCTTTATCTACTACAGGGGAG  
\*\*\*\*\*  
3' end **GCTATACAAATAAAGCTGAATTGAATTGAATTGAATTGA**AGCTTCAGAGAATGAAATACTCCTTTATCTACTACAGGGGAG

### pWC4. 1a

5' end AGCCAGGCACCCATATGCCACCCAGACGACAAGGCTCCAGCTTACAGT**ATTGCAGACGAACAATATTTTGAAGTGTTCAG**  
\*\*\*\*\*  
gg\_chr19 - AGCCAGGCACCCATATGCCACCCAGACGACAAGGCTCCAGCTT**ACACGT**TGTGCCACCTAGAGGCGCTCCAAGACCGCAGCTG  
\*\*\*\*\*  
3' end **AAGCGTATACAAATAAAGCTGAATTGAATTGAATTGA**AAACACGTGTGCCACCTAGAGTGCTCCAAGACCGCAGCTG

### pWC7. 2a

5' end CAGAACAAAATACTTCACAACCAGACGACCAAAAGGGATCATACAACAATA**AATAACTGGAATCTTTCTGGGAGCGTCTAGGCTCTCCGTC**  
\*\*\*\*\*  
gg\_chr8 - CAGAACAAAATACTTCACAACCAGACGACCAAAAGGGATCATACAAC**AATAA**AGAAAATGACAACAATGAATTAACACATTAGTAGATTAGAAG  
\*\*\*\*\*  
3' end **TTGTAAAGCGCTATACAAATAAAGCTGAATTGAATTGAATTGAATTGA**ATAAGAAAATGACAACAATGAATTAACACATTAGTAGATTAGAAG

pWC9. 1a

5' end  
GGGGGGGACCTTATTTGGATCCTTTTTTATGTTTTACAGACATGGGATCAGCTTCACTGCTATGCAGATGATACTCAA  
\*\*\*\*\*  
gg\_chr1 - GGGGGGACCTTATTTGGATCCTTTTTTATGTTTTACAGATTGTATTTCATTGTGCAAAATGAAAATCTATTTCTTTTT  
\*\*\*\*\*  
3' end  
AAAAGCGCTATACAAATAAGCTGAATTGAATTGAATTGTATTTCATTGTGCAAAATGAAAATCTATTTCTTTTT

pWC9. 2a

5' end  
TATGAATATTTTCATCTTCACAGATTGTTTCTGTATCAAGTAATCAAGTAAAGGAGTCGAGCCTT  
\*\*\*\*\*  
gg\_chr1 - TATGAATATTTTCATCTTCACAGATTGTTGAAAATATGCGTGACTTGTGGTAAGCTATGTCTCAG  
\*\*\*\*\*  
3' end  
AGCTGAATTGAAAAATTGAATTGTTTGAATAATGCGTGACTTGTGGTAAGCTATGTCTCAG

pWC10. 1a

5' end  
CCATTGCTTTCAACATGGTTTTTAACAACCTGTTGTATCGTTCAATTTTACCAGACTACTCGCACCATCTGACTAGCAGGTAAAAATTCA  
\*\*\*\*\*  
UCSC\_gg\_chr2 + CCATTGCTTTCAACATGGTTTTTAACAACCTGTTGTATCGTTCAATTTACCAGAAGCTGGTGCATGATAGGGGATATGATAAATCCACTC  
\*\*\*\*\*  
UCSC\_gg\_chr2 + CCATTGCTTTCAACATGGTTTTTAACAACCTGTTGTATCGTTCAATTTACCAGAAGCTGGTGCATGATAGGGGATATGATAAATCCACTC  
\*\*\*\*\*  
3' end  
GTAAAAGCGCTATACAAATAAGCTGAATTGAATTGAATTGAATTACCAGAAGCTGGTGCATGATAGGGGATATGATAAATCCACTC

pWC10. 2a

5' end  
GTTGACACTGGTTGTCCCTGAATCAGAGAACATCAGCTGAGTTGGATAGATGACGCTAATGATACATTAGGGCTCGCGTTTATGGATTTAATACACT  
\*\*\*\*\*  
gg\_chr4 - GTTGACACTGGTTGTCCCTGAATCAGAGAACATCAGCTGAGTTGGATGTTGTGGAGAATTGAGGCATTCAAAATGTCTGTGTTGTGGTCTGAGATC  
\*\*\*\*\*  
3' end  
ATCTACATTGTAAAAGCGCTATACAAATAAGCTGAATTGAATTGAATTGTTGTGGAGAATTGAGGCATTCAAAATGTCTGTGTTGTGGTCTGAGATC

pWC10. 4a

5' end ATGTTACAAGGCAACAGCACACCCATACCACACATTATTCAAATCTTTCTGGGAGCGTCCTAGGCTCTTCGTCCTGACGGCCTGCACCCC  
\*\*\*\*\*  
gg\_chr4 - ATGTTACAAGGCAACAGCACACCCATACCACACATTACACAGAATAAATCTATTCTTATCATCGGCTACAATTAATCAGTTACAAAACCT  
23245002  
23242359  
gg\_chr4 - GAAAACCAATCTGATCTTTATTTTTCACAGTTACTCTAAGGACACCACTTCATACGCAGCATATTTGAAACTGAATCTATTACATTATGA  
\*\*\*\*\*  
3' end AGCGCTATACAAATAAAGCTGAATTGAATTGAATTGACACCACTTCATACGCAGCATATTTGAAACTGAATCTATTACATTATGA

pWC10. 6a

5' end TGTGTCGTATCCTCCAAGGGATGAAGCTTAGCTGTCATTGCTGGGAGAAGCATCGATGGAGCGTTGGAGCTGGAGCTGGAAGAAGTGGAGTCCCAGAT  
\*\*\*\*\*  
gg\_chr1 - TTACTTACCAGTCAATGACAAGAAAGCTTAGCTGTCATTGTTCAGCTCATTTAACTTTTTTCTTTTTTGATCTAGGATTTCACTCCGAAATCTGCAA  
\*\*\*\*\*  
3' end CATTGTAAAGCGCTATACAAATAAAGCTGAATTGAATTGAATTGAATTGAATTAACTTTTTTCTTTTTTGATCTAGGATTTCACTCCGAAATCTGCAA

pWC11. 2a

5' end CAAAAGTAAGTGGGAAATGAGTTTCTGGCTTGTACTGTTTAATATTACATAACTGGAATCTTTCTGGGAGCGTCCTAGGCTCTTCCG  
\*\*\*\*\*  
gg\_chr3 - CAAAAGTAAGTGGGAAATGAGTTTCTGGCTTGTACTGTTTAATATTTTCTATTCTCATATTTGAAGATCTGTTTCAAACCTCGCTG  
\*\*\*\*\*  
3' end AAAGCGCTATACAAATAAAGCTGAATTGAATTGAATTGAATTGAATTTCCTATTCTCATATTTGAAGATCTGTTTCAAACCTCGCTG

pWC11. 6a

5' end AGCCACTGAGTGGCTGAGATGGTGCAGAGGGTGCAAGAAGGCGAGCGAATCTTTCTGGGAGCGTCCTAGGCTCTTCCGTC  
\*\*\*\*\*  
gg\_chr17 + AGCCACTGAGTGGCTGAGATGGTGCAGAGGGTGCAAGAAGGCGAGCGGAGCGCTGTGCTGCTCCCCCTTCCATGGGGCAGCCGTA  
\*\*\*\*\*  
3' end AAAGCGCTATACAAATAAAGCTGAATTGAATTGAATTGAATTGAATTGCGCTGTGCTGCTCCCCCTTCCATGGGGCAGCCGTA

pWC12. 1a

5' end  
GAGCAGCTGAACCCATCCCAGACCGCCTGTGTTAAAGCTGC**CAAGGTGCTTCCCAGATCCCGGGGCAGAACGCTCTCGCCTGTG**  
\*\*\*\*\*  
gg\_chr17- GAGCAGCTGAACCCATCCCAGACCGCCTGTGTTAAAGCT**GCCAAGGG**GAGAGCTAGCTTTATGTCCCTCCAGAGCCCTCCAACAC  
\*\*\*\*\*  
3' end **GCGCTATACAAATAAAGCTGAATTGAATTGAATTGAATTG**CCAAGGGAGAGCTAGCTTTATGTCCCTCCAGAGCCCTCCAACAC

pWC12. 4a

5' end  
TCCCACAGTGCAAAAAATTTCCAAAGTTTAAATTCTGAT**GAAATTGCTCTTTGCTAATACTGGAATCTTTCTGGGAGCGTCTTAGG**  
\*\*\*\*\*  
gg\_chr4 + TCCCACAGTGCAAAAAATTTCCAAAGTTTAAATTCTGAT**GTTGTTT**TAAAGAGAAAGGCTAGTTTAAATCAAGAATATAATTCATA  
\*\*\*\*\*  
3' end **AGCGCTATACAAATAAAGCTGAATTGAATTGAATTGAATTG**TTGTTTAAAGAGAAAGGCTAGTTTAAATCAAGAATATAATTCATA

pWC12. 5a

5' end  
ATGTAGTTTGGATTGTGGCCTGATGAAGCAAAGTAAATAAGAGTTATTG**TATAAGAGTTATTCTCTATTTTCACCTGGGGATA**  
\*\*\*\*\*  
gg\_chr3 + ATGTAGTTTGGATTGTGGCCTGATGAAGCAAAGTAAATAAG**AGTTATT**GACAAGATGACGAACCTGAAAGCTTGGTTCTGCTT  
\*\*\*\*\*  
3' end **AAGCGCTATACAAATAAAGCTGAATTGAATTGAATAAAAAA**AGTTATTGACCAGATGACGAACCTGAAAGCTTCATATAGCAC

pWC13. 1a

5' end  
TTTGCTTTGTGTTTGAATTGATGTCTTCTCCACAGCTGCCTGTAGT**GTACCATCTGACTAGCAGGTAAAAATTCACAAAATTCACACTATAG**  
\*\*\*\*\*  
gg\_chr4 + TTTGCTTTGTGTTTGAATTGATGTCTTCCACAGCTGCCT**GTAGTGG**CACTGGGGATAGAGGGATGTTTGTACTTATTTCTTCTTTAACT  
\*\*\*\*\*  
3' end **AAAGCGCTATACAAATAAAGCTGAATTGAATTGAATTGAATTG**TAGTGGCACTGGGGATAGAGGGATGTTTGTACTTATTTCTTCTTTAACT

pWC13. 2a

5' end AATCTACCTTGACTAGCAGCAGTGCCATCCTCTCTGCTTTTCTGGGAGCGTCCTAGGCTCTCCGTCCTGACGGCCTGCA  
\*\*\*\*\*  
gg\_chr3 + AATCTACCTTGACTAGCAGCAGTGCCATCCTCTCTGCTAGGAGTGAACTCAGTGCCATGCTGGGGCTTCAGGAAAGCAGA  
\*\*\*\*\*  
3' end GCGCTATACAAATAAAGCTGAATTGAATTGAATTGAATTAGGAGTGAACTCAGTGCCATGCTGGGGCTTCAGGAAAGCAGA

pWC13. 4a

5' end AGGTTTTTTTCTCCACCCACTCCATTTTTTACTGCGTTGTTCACTTGTATTAAAGCCTATTATTAAGAAACCGCACTAGACACCAACAA  
\*\*\*\*\*  
gg\_chr14 + AGGTTTTTTTCTCCACCCACTCCATTTTTTACTGCGTTGTTCACTTGTCTTATAGGACAGGCTGCAAAATTACGAGGTTGCAGTGGA  
\*\*\*\*\*  
3' end AAAGCGCTATACAAATAAAGCTGAATTGAATTGAATTGAATTGAATTGCTTGGTCCTTATAGGACAGGCTGCAAAATTACGAGGTTGCAGTGGA

pWC13. 5a

5' end GGCACAGCACCCGAAGGAATCACTACTTCTACCTGAGAAGGTCCTTTGTTGAGTAGACTTTTAGCTTTGAATGAATGGCTAATAACATGGTGTA  
\*\*\*\*\*  
gg\_chr4 + GGCACAGCACCCGAAGGAATCACTACTTCTACCTGAAAAGGTCCTTTGTTGTCATGAGCATCACATGCGGTCTGAGTAATGCTTCTTCTGCTTCT  
\*\*\*\*\*  
3' end TACATTGTAAAAGCGCTATACAAATAAAGCTGAATTGAATTGAATTGAATTGCTCATGAGCATCACATGCAGTCTGAGTAATGCTTCTTCTGCTTCT

pWC13. 6a

5' end GAGAAGGCAAGCTTTGTTCTAGTTCTGCAACGCTCTGAAACTGTTTAGTAAAGCATCTGTCAACACCCGTGCGTTTATTCTGTCTTTTA  
\*\*\*\*\*  
gg\_chr2 - ATGCTCTAAAGCTTTGTTCTAGTTCTGCAACGCTCTGAAACCATGAATTGTAACACATCGGCTACAAAACCAACTGCTCCACCTGATACAG  
\*\*\*\*\*  
3' end CTATACAAATAAAGCTGAATTGAATTGAATTGAATTGAATTGAATACCATGAATTGTAACACATCGGCTACAAAACCAACTGCTCCACCTGATACAG

pWC14. 1a

5' end  
gg\_chr7 -  
3' end

```
TGCAATCCACACATGCCTCACTGAGGCATGTTCACTTCACAAAACAGAATTATTACTTATTGGGCCTAA
*****
TGCAATCCACACATGCCTCACTGAGGCTCCCAAGTGGAGTTTGCACTTGCTATTTAAATTAGTGTTTTGGAGCTT
*****
CTGAATTGAATTGAATTGAAGGCTCCCAAGTGGAGTTTGCACTTGCTATTTAAATTAGTGTTTTGGAGCTT
```

pWC14. 3a

5' end  
gg\_chr1 +  
3' end

```
TGCAATTTCCAACAAAAGCATTTCCTCCCAACAAGAAATTTCTGGGAGCGTCCTAGGCTCTTCGGTCTGACGGCC
*****
TGCAATTTCCAACAAAAGCATTTCCTCCCAACAAGCAGCACTGAAGTGACACCTACGGAAGCACCACCTCAAATGT
*****
AAATAAGCTGAATTGAATTGAATGAACAAGAACCAACTGAAGTGACACCTACGGAAGCACCACCTCAAATGT
```

pWC14. 5a

5' end  
gg\_chr5 -  
3' end

```
ATTCTTGTCACATTATTCTTGCTCAGTGTCTCCTTTTAAAGCTCTATGCCACCTAGACTCTTGTTACCCCACTTAACATCAGTAACGC
*****
ATTCTTGTCACATTATTCTTGCTCAGTGTCTCCTTTTAAAGCTCTATGCCACCTAGACTCTTGTTACCCCACTTAACATCAGTAACGC
*****
TGTAAGCGCTATACAAATAAGCTGAATTGAATTGAATCTATGCAGGTACCTGTGGCATGCAGCACAACCTACCCGTAATGGAGC
```

pWC14. 6a

5' end  
gg\_chr2 +  
3' end

```
TGTTGTGTTTTGATTAGATCTAATTAGATCTAATTAGATCTAATTAGATCTAATTAGATCTAATTAGATCTACATTAGATCTAATTCTGTCTTATGGAAT
****
AGTTTATTGTTTGGTTTGTATGTTTGTGTTTAAATTTATCTTCTTATCATGTTGAAAGCTTATAGTTTTTGTAT
*****
AAAGCTGAATTGAATTGAATTGAATTTTGTGTTTAAATTTATCTTCTTATCATGTTGAAAGCTTATAGTTTTTGTAT
```

5' end TAATTAATTTATTAATATTAATTTAGTAATTTAGGAGTAATATTTGCTTTATAACCTATAAAGCTCTAAATAATCTAGCTCCTGTTTATCT

5' end TTTTAAAGTTTCTAACTACAGTGACGAACAGGAGTAATATTTGCTTTAGTAATATGGAGTAATATTAATTATTAATTTATTAATATTAATTTATTAAT

\*\*\*\*\*

gg\_chr1 + TTTTAAAGTTTCTAACTACAGTGATGAACAGGAGTAATATTTGCTTTAGATAAACTGCACACTGA-----GTTTCTTGTTTGTGTTTGTGTTT

\*\*\*\*\*

3' end GTAAAGCGCTATACAAATAAAGCTGAATTGAATTGAATTGAACCTTAGATAAACTGCACACTGAGTTTTTTGGTTTCGTGTTTGTGTTTGTGTTT

```

5' end      GTTGCCTGTAATATCAGAAGATGTTAAACAGGATATGTTTAAACATAACACGAATATGCT
            *****
gg_chr2 +   GTTGCCTGTAATATCAGAAGATGTTAAACAGGATGTTGGGGGTGTTAGGAAAAGGTTCTTCAT
            *****
3' end      AGCTGAATTGAATTGAATTGAATTGAATTAACAGGATGTTGGGGGTGTTAGGAAAAGGTTCTTCAT

```

5' end  
 ggcchr2 -  
 3' end  
 'DELETION'  
 TK109-17  
 5' end  
 ggcchr2 -  
 3' end  
 TK109-17

5' end                   TATGTATTTTAAGAGACACAGCGGGCTATAGTCTAATCAACTCTTATTCTCTTTATTCTCTATTTTCACCTGGGGATACTCATCCGAG  
\*\*\*\*\*  
gg\_chrZ +           TATGTATTTTAAGAGACACAGCGGGCTATAGTCTAATCAACTGCACAGAACTATGATTAGTAAAGTACTTCTGCGATGCAGTAAAGA  
\*\*\*\*\*  
3' end                   AAAGCGCTATACAAATAAAGCTGAATTGAATTGAATTGAACTGCACAGAACTATGATTAGTAAAGTACTTCTGCGATGCAGTAAAGA

pWC16. 2a

5' end  
TTGTTGACTGATAAGATCAGTACAACTCCAGTTACAGCATTCTTACTCTGGAATAGCCTTCTGGTAATGTCCGAGGCTCAGACACACTCTCCAG  
\*\*\*\*\*  
gg\_chr3 + TTGTTGACTGATAAGATCAGTACAACTCCAGTTACAGCATTCTTAATGAGAGAATATTCGTGTTTGACACCAAGGCTTGTCTAAGTTATTTAAGG  
\*\*\*\*\*  
3' end CTGCTTTGACACAATCTACATTGTAAAGCGCTATACAAATAAAGCTGAATTGAATTGTTTGTGACACCAAGGCTTGTCTAAGTTATTTAAGG

pWC16. 3a

5' end  
GAATTGCTTCATATAGTAAGTATACTTACCACTAGTGAAATCGCTTAAAGCATACATTAGATCTAATTCTGTCTTATGGAATCGAG  
\*\*\*\*\*  
gg\_chr5 + GAATTGCTTCATATAGTAAGTATACTTACCACTAGTGAAAGCTGTTCCCAAATAGGTAAGAATGTTTCAAGCATGTTATAGTGT  
\*\*\*\*\*  
3' end CTATACAAATAAAGCTGAATTGAATTGAATTGAATAACTGTTCCCAAATAGGTAAGAATGTTTCAAGCATGTTATAGTGT

pWC21. 1a

5' end  
CTCTACAGGAATCCACACGCATAACTTTCTTAACCTGTGAGATCTCTAGAAGCTGGGAGAAGCATCGATGGA  
\*\*\*\*\*  
gg\_chr10 - CTCTACAGGAATCCACACGCATAACTTTAACCTTCCAGATAGCATCTGCAGTCCTGACCATTGTAACACACA  
\*\*\*\*\*  
3' end TACAAATAAAGCTGAATTGAATTGAATTAACTTCCAGACAGCATCTGCAGTCCTGACCATTGTAACACACA

DELETION

TK109-17  
ACATCGACTACAAAGACGATGACGACAAGTCGCTTCCGTCTCTGTCTTGTGTGCAGGAGAAGCATCGATGGA  
\*\*\*\*\*  
5' end CTCTACAGGAATCCACACGCATAACTTTCTTAACCTGTGAGATCTCTAGAAGCTGGGAGAAGCATCGATGGA  
\*\*\*\*\*  
gg\_chr10 - CTCTACAGGAATCCACACGCATAACTTTAACCTTCCAGATAGCATCTGCAGTCCTGACCATTGTAACACACA

pWC21. 3a

5' end  
AGTTGGGTTGCAGAAAGGTTTATGGATGGCTTACTGTCTTCCACTGCTTGTGTGCAGGAGAAGCATCGATGGAGCGT  
\*\*\*\*\*  
gg\_chr15 - AGTTGGGTTGCAGAAAGGTTTATGGATGGCTTACTGTCTTCCACTGCTCAGATTTCAGCAGCAGCAATACGTCTTAAATT  
\*\*\*\*\*  
3' end GTAAGGCGCTATACAAATAAAGCTGAATTGAAATTGAATTGCTCAGATTTCAGCAGCAGCAATACGTCTTAAATT

pWC22. 1a

5' end

gg\_chr 24 -

3' end

```
AGCTTGTCATGTGAACTATAAGGCATCACCAGATTAGAGGATTCAGCTGTGATCTCTAGAAGCTGGGTACTA
*****
AGCTTGTCATGTGAACTATAAGGCATCACCAGATTAGAGGATTCAGCTGTGAGTTGCTAACCCAATGCATCT
*****
TCTACATTGTAAAAGCGCTATACAAATAAAGCTGAATTGAATTGAATTGAGTTGCTAACCCAATGCATCT
```

p7C2. 1a

p7C3.1a

p7C7. 2a

p7C24. 1a

```

5' end      AAGCTTAAGCTATAGGAGATAATGAGAAGTTCATTCTCTATTTTCACCTGGGGATACTCATCCCGA
*****
gg_chr1 -   AAGCTTAAGCTATAGGAGATAATGAGAAGTGCGTTAGAAATCACAAAAAGTGAAAGACGTGTTCAG
*****
3' end      AGCTGAATTGAATTGAATTGAATGAGAAGTGCGTTAGAAATCACAAAAAGTGAAAGACGTGTTCAG

```

5' end AAAACTTCGCCTCTCTGAAGTCATGTACTTAGAGAATA **TTAATA**TTAATATTAAACAGAGAAACGGACTTATGTTTAGCTCCTTTGAAG  
\*\*\*\*\*  
gg\_chr1 - AAAACTTCGCCTCTCTGAAGTCATGTACTTAGAGAATA**ATCTCAACACTTATTTAA**AATTAAATGTTGCTTCGGAAT**ACTTGAATATG**  
160093519 160092367  
gg\_chr1 - **GGGATGGTGGCAACTCACAGCCAGAGGA**ACTAT**CCTGCTCGCTAC**AGCCGACTGGTAAACAGATAAACATAATATTTGGATAAATGGA  
\*\*\*\*\*  
3' end **GCGCTATACAAATAAAGCTGAATTGAATTGAATTGAATTGA**AGCCGACTGGTAAACAGATAAACATAATATTTGGATAAATGGA

5' end AGGGAGGGGTATTCCCTTGGGGAAAAAATAAGTTATCAGCAATTTAAT **AATAATCATAACAATCCTAGATTTTATTTAACACCCTCTCTAAATTAGCA**  
 \*\*\*\*\*  
 gg\_chr2 - AAAGGGAGGGTTATTCCCTTGGGGAAAAAATAAGTTATCAGCAATTTAATAAT **GCTTTAATTGTCTCTGTTATACTGACTGTGATCTTCTATTCTCTT**  
 145680423 145679331  
 gg\_chr2 - **AAACAGCATAGAAGGAGAAAAATGTGCAGTGTTGGGAGAACCAATCTCA**TTACACACAGGACAAAGCAGAGGGCACCAGAAACATTGGCCTTGAA  
 \*\*\*\*\*  
 3' end **ATCTCATGTGTAAGGCGCTATACAAATAAAGCTGAATTGAATTGAATTGAATT**ACACACAGGACAAAGCAAGGGGCACAGAAACATTGGCCTTGAA

5' end  
\*\*\*\*\*  
gg\_chr5 -  
\*\*\*\*\*  
3' end

5' end                   ATTGATCTTACTGTCCATAATTAATCT**AAAATTATGA**CTATTATT**AAAAAT**T**AGAACTATTG**  
\*\*\*\*\*  
gg\_chr4 -           ATTGATCTTACTGTCCAT**AATTAAGTCT**GAATGATTCCAAGATGCTACTAAAGTGACCTGGATT  
\*\*\*\*\*  
3' end                   **CTGAATTGAATTGAATTGAATT**AAATCTGAATGATTCCAAGATGCTACTAAAGTGACCTGGATT

```

TK109-17          TATAAGCTATGTTTACCTGAAATCAGCAAACCCGCTCCAATCTACCGCCCTAGTGAACATTATG
                    *****
5' end            ATTGATCTTACTGTCCATAATTAATCTAAAATTATGAACATTATTAAAAATTAGAACATTG
                    *****
gg_chr4 -         ATTGATCTTACTGTCCATAATTAATCTGAATGATTCCAAGATGCTACTAAAGTGACCTGGATT
                    *****
3' end            CTGAATTGAATTGAATTGAATTAATCTGAATGATTCCAAGATGCTACTAAAGTGACCTGGATT
                    *****
TK109-17          CTGAATTGAATTGAATTGAATGGATCCAGACATGATAAGATACATTGATGAGTTTGGACAACCC

```

5' end GAAATTTAGTGTGCAGGTAATCCTGTACAGAACAAATACTGTGTAACATCATTCCTCTACCTCAACCCCGCGTCCTTCTCTGTCCAGG  
\*\*\*\*\*  
gg\_chr 15 - GAAATTTAGTGTGCAGGTAATCCTGTACAGAACAAATACTGTGAACAGCGCTGCTCCGAGGGTCTGAAGCTCCTCTACCCACCTCAA  
8446315  
8446157  
gg\_chr 15 - GTGCATGAAATACCAGGTTTAGACTCCAACAGAGGCACATGTACTGAAATAAAATGGAATAAAAAGAGTTCTGAAAGGTTTCAGGT  
\*\*\*\*\*  
3' end AAAAGCGCTATACAAATAAAGCTGAATTGAATTGAATTGAATGTACTGAAATAAAATGGAATAAAAAGAGTTCTGAAAGGTTTCAGGT

5' end GAAATTNTGATGTAATTCAAAATTAACAATTCAAAAAAAAAAAAAACC GCGCAAC  
\*\*\*\*\*  
gg\_chr6 + GAAATTCTGATGTAATTCAACAATCTAAATAAGTGACTGACAGTAAGGTT  
\*\*\*\*\*  
3' end AATTGAATTGAATTAATTCATGTACAACATCTAAATAAGTGACTGACAGTAAGGTT

[illegible]

5' end CTACATTTTGGGAAGCATATGTATATTTTCACTGCAAGTATGCATTAAATAAAGTCTGACCAGGTCTAGAAAATATGATCATATAACCCG  
\*\*\*\*\*  
gg\_chr1 - CTACATTTTGGGAAGCATATGTATATTTTCACTGCAAGTATGCATTGCTGAGAATAATATGCAGATACAGGAGGTTATAATGGGATCTATTCAA  
\*\*\*\*\*  
3' end TGTAAAAGCGCTATACAAATAAGCTGAATTGAATTGAATTGCTAGAATAATATGCAGATACAGGAGGTTATAATGGGATCTATTCAA

p7C48. 1a

5' end  
gg\_chr3 -  
3' end

```
ATTGGAACAGTTTCTTCTCCTTTTAAACAAACCTAGAATAAAGACAGTCTACAGGTGTCCAGGGACAGGTCTACAATGGTTAAGTCATACT
*****
ATTGGAACAGTTTCTTCTCCTTTTAAACAAACCTAGAATAAAGACAGAGGTGCTGCCTACCCGTTTTGTAACATACGGAGGCTCTCAAGTGG
*****
CATTGTAAAGCGCTATACAAATAAAGCTGAATTGAATTGAATTGAAGGTGCTGCCTACCCGTTTTGTAACATACGGAGGCTCTCAAGTGG
```

p7C49. 1a

5' end  
gg\_chr8 -  
3' end

```
CCAGGTGCTCAATCAGGATTCAATCAGGAATCAATCAGGATCAATCATGGAAAAAACTAATTAGA
*****
CCAGGTGCTCAATCAGTGGTTCAGGCCGTGACTCAGCAGTTACCATACAGATGCTAACACCTCTGGCT
*****
TTGAATTGAATTGAATTGGTTCAGGCCGTGACTCAACAGTTACCATACAGATGCTAACACCTCTGGCT
```

p50. 1a

5' end  
gg\_chr4 +  
3' end

```
ACTCTTTAGCTGGTGGGACAACAAGTTTACTACCATGATCTCTAGAAGCTGGGTACTAGCGGCCGCCACCA
*****
ACTCTTTAGCTGGTGGGACAACAAGTTTACTACCATGAAATGGCATTAAAAGCCACAGACTTCCCAGCTAA
*****
AAAGCGCTATACAAATAAAGCTGAATTGAATTGAATTGAATGGCATTAAAAGCCACAGACTTCCCAGCTAA
```

p7C51. 1a

5' end  
gg\_chr3 -  
3' end

```
CTAGGTTGTTTCATAGTACTAATCAAACAGACTCATGCTAACCATAGAGATTACCTCAGAAGAACTCGTCAAGAAGGCGATAGAAGGCGATGC
*****
CTAGGTTGTTTCATAGTACTAATCAAACAGACTCATGCTAACCATAGAGAAAAATTAACATATCATGGACTTCTGATTAACCAGATCTCTTA
*****
TTGTAAAGCGCTATACAAATAAAGCTGAATTGAATTGAATTGAATTGAATTAATTAACATATCATGGACTTCTGATTAACCAGATCTCTTA
```

5' end CCACAAAAACAATCCAGCTAGTTTCTAACCAATATGAGAAATTCACCAAGGACCAA**AAGTGGAACTCTTTCTGGGAGCGCTCTAGGCTC**  
 \*\*\*\*\*  
 gg\_chr2 + CCACAAAAACAATCCAGCTAGTTTCTAACCAATATGAGAAATTCACCAAGGACCAA**AAGATGTTTGTGTAGTCTATACATACTCAGAA**  
 \*\*\*\*\*  
 gg\_chr2 + **AGAGCACCCTCTTTGAAAGTGATTTTAACTAAATAGTT** 47868106 47867647  
 \*\*\*\*\*  
 3' end **AAAGCGCTATACAAATAAGAGCTGAATTGAATTGAATTGAAT**TAATACATCATGTGCAATTTCTTAGTTCACCAAGGTGGGCAACATT  
 \*\*\*\*\*

5' end TACAGCATAAAAGACTAAAAAAAAAGACTAAAAAAGACATAAAAGACACTTAAACCTTAAACAT  
\*\*\*\*\*  
gg\_chr2 + TACAGCATAAAAGACTACTAAGTGTAATCTAAAGTCTGTGTGCACATCCCAGCAAAGTGATTTCAC  
\*\*\*\*\*  
3' end TTGAATTGAATTGAACTAAGTGTAATCTAAAGTCTGTGTGCACATCCCAGCAAAGTGATTTCAC

5' end TACATTACCTCTGCAGTTTATTGTAGCCAGATATAATGCAGATATAATGTCAGCCTTAAACATCAGTAAAC  
\*\*\*  
gg\_chr2 + TACGTTACCTCTGCAGTTTATCGTAGCCAGATATAATGTAGATCAGCTTAAATACCACCAAGACAGCAGTTAAAAAGCAGCAGTCTTTAAG  
\*\*\*\*\*  
3' end AAGCGCTATACAAATAAAGCTGAATTGAATTGAATTGAATCAGCTTATACCACCAAGACAGCAGTTAAAAAGCAACAGTCTTTAAG

5' end CGCTGTGGCCCGCAGACTTGCCCGAGTGAAGCTGTAGCTTTGTGATACCTT**TGAGATCTCTAGAAGCTGGGTACTAGCGGCCGCA**  
 \*\*\*\*\*  
 gg\_chr13 - CGCTGTGGCCCGCAGACTTGCCCGAGTGAAGCTGTAGCTTTGTG**TACCCG**CCAAATGTTGCTGAATTTATCTTTTCAGCACACCT  
 \*\*\*\*\*  
 3' end **AAGCGCTATACAAATAAGCTGAATTGAATTGAATTGAAT**ACCTCCAAATGTTGCTGAATTTATCTTTTCAGCACACCT

p7063. 1a

5' end

CTGTAGCACTCTGTGTACTCATACTCTTCATTACATCACAGT **AGATCTCGCAACTCAATTTACAATTAGAGGGATACAAAGTTAGCTTTAG**  
\*\*\*\*\*

gg\_chr12 -

CTGTAGCACTCTGTGTACTCATACTCTTCATTACATCACAGT **CAAAAGGCAGTGACACAAGAAATCGGTGTATATGCTCCTGTTATCTG**  
4045457  
4041036

gg\_chr12 -

**ATTCATTTGCTCAAAACTAACCTAGAGTGTATTTTCAGAAAC**ACATCTGAATCTCAACGTCAAATGTTGCAAATAGAGATTAACCTAT  
\*\*\*\*\*

3' end

**AAAGCGCTATACAAATAAAGCTGAATTGAATTGAATTGA**ATCATCTGAATCTCAACGTCAAATGTTGCAAATAGAGATTAACCTAT

## ZfL2-1 / HeLa-RC cells

### Ra102

5' end  
hs\_chr13 +  
3' end

```
TGTGTT CAGGAAGAACTGACTCCTTTATCATTATTTTGAAGCTGGGTACTAGCGGCCGCCACCATGGACTACAAAGACCATGAC
*****
TGTGTT CAGGAAGAACTGACTCCTTTATCATTATTTGACCTCTTTATGTCTGATAACATTCCTTGCTTTGAAATTACTCTGTC
*****
AAAGCGCTATACAAATAAAGCTGAATTGAATTGAATTGAATTGAATTATGTCTGATAACATTCCTTGCTTTGAAATTACTCTGTC
```

### Ra103

5' end  
hs\_chr11 -  
3' end

```
TTGCATGTCTCTAATGATCAGTGAAGTTGAGCTTTTTTTCATACAGGTGTCCAGGGACAGGCTCTACAATGGTTTAAGTCA
*****
TTGCATGTCTCTAATGATCAGTGAAGTTGAGCTTTTTTTCATACATTTGTTGGCCACATAAATATCTTCTTTAGAGAAGTG
*****
ATAAAGCTGAATTGAATTGAATTGAATTGAATTGAATTGAATTACGTTTGTGGCCACATAAATATCTTCTTTAGAGAAGTG
```

### Ra105

5' end  
hs\_chr9 -  
3' end

```
AGCCCAGCTAACACATGCCATAAAAGGACAGAGTAGAGTGGAGAAGAGTAGAATAATCTAGCTCCTGTTTATCTAACCAACCTTCTGTCTCGC
*****
AGCCCAGCTAACACATGCCATAAAAGGACAGAGTAGAGTGGAGAAGAGTAGAAGATATCTTTGGTACAATGAAGAATATTTACCTGAGTTC
*****
AATCTACATTGTAAAAGCGCTATACAAATAAAGCTGAATTGAATTGAATTGAATTGAAGATATCTTTGGTACAATGAAGAATATTTACCTGAGTTC
```

### Ra112

5' end  
hs\_chr13 -  
3' end

```
CAAGAGATTGAATGGAGTCAACTTGGAGAGTAGAGGCAGCCTGTAACTCGCTCCTTAAGATCTCAAAATTCAGGGCTTCTGGTAGTACC
*****
CAAGAGATTGAATGGAGTCAACTTGGAGAGTAGAGGCAGCCTGTTAGAGGAAAATGGGAAAATGGGAATGGAACCTGGATAAATGCA
*****
ACATTGTAAAAGCGCTATACAAATAAAGCTGAATTGAATTGAATTGAATTGAGAGGAAAATGGGAAAATGGGAATGGAACCTGGATAAATGCA
```

### Ra115

5' end TTCTTTCTAATCCTTCTAATAACCTAGAGAAGTGAGGAAGTAGCAAAATCAAGTAAAGGAGGTCGAGCCTTCTCTTTTCATGGCTCCTACA  
\*\*\*\*\*  
hs\_chr1 + TTCTTTCTAATCCTTCTAATAACCTAGAGAAGTGAGGAAGTATCCTTATCCGCAGCCTACAGATGAGAAAACGTAGGCTCAGCGAAGAGC  
\*\*\*\*\*  
3' end CTACATTGTAAAAGCGCTATACAAATAAAGCTGAATTGAATTGAATTCCTCGCAGCCTACAGATGAGAAAACGTAGGCTCAGCGAAGAGC

### Ra121

5' end AAAAAAAAAAACACACACAAAGAAATAAATCTTACCATTATTTAAGGAGATTATTAAGAAACCGCAACTAGACACCAACAACCTTAGCTAACT  
\*\*\*\*\*  
hs\_chr10 - AAAAAAAAAAACACACACAAAGAAATAAATCTTACCATTATTTAAGGAGATTATTAAGAAACCGCAACTAGACACCAACAACCTTAGCTAACT  
\*\*\*\*\*  
3' end ATCTACATTGTAAAAGCGCTATACAAATAAAGCTGAATTGAATTGAATTGAGATTATTAAGAAACCGCAACTAGACACCAACAACCTTAGCTAACT

### Ra123

5' end CTTTTGGGCAAAGATATGGTGGAATAATGCTGTAGATACACTCTCCAGTTCAAACCTAGATTAAAGACCTATCTGTTTAGTAAAGCA  
\*\*\*\*\*  
hs\_chr6 + CTTTTGGGCAAAGATATGGTGGAATAATGCTGTAGATCCTTATAATGATGACTTTTTATCACTTGGCTAAGATAGTGCCTGCCAC  
\*\*\*\*\*  
3' end AAAGCGCTATACAAATAAAGCTGAATTGAATTGAATTGAATTGATATAATGATGACTTTTTATCACTTGGCTAAGATAGTGCCTGCCAC

### Ra124

5' end GGACAGGGGAGGAAGAGAGCCCCAGCCCCCTTTTCCACTCTGCACTCTTATTCTCTATTTTACCTGGGGATACTCATCCCAGGTCC  
\*\*\*\*\*  
hs\_chr7 + GGACAGGGGAGGAAGAGAGCCCCAGCCCCCTTTTCCACTCTGCACTCTTATTCTCTATTTTACCTGGGGATACTCATCCCAGGTCC  
\*\*\*\*\*  
3' end TGTAAGCGCTATACAAATAAAGCTGAATTGAATTGAATTGAATTGCTCTCAAGGTCCAGGTGACTATGGGACCCGAGGAGGTGCTGA

## Ra125

5' end CTCAGGCCGCCCTCAGGGCTGATTTAGACTACTTCGCACCATCTGACTAGCAGGTAAAAATTC  
\*\*\*\*\*  
hs\_chr1 + GGTGATGATCTGGGAAACTCAGGCCGCCCTCAGGGCTGATTTGATCTTTGCTATTGGACTCTGTGACACTGTCAGTCTG  
\*\*\*\*\*  
3' end GCTATACAAATAAAGCTGAATTGAATTGAATTGAATTGATCTTTGCTATTGGACTCTGTGACACTGTCAGTCTG

## Ra126

5' end GGTGTGTAGTAGGCTATAATATCTAGGTTTATGTATGTACACGCTAAGATGTTGCACTCTTTATTCTCTATTTTCACCTGGGGATACTCATCCCGAGG  
\*\*\*\*\*  
hs\_chr12 - GGTGTGTAGTAGGCTATAATATCTAGGTTTATGTATGTACACGCTAAGATGTTGCAATGACAAAATTATCTAACATGCATTCTCATAATGCATT  
\*\*\*\*\*  
3' end ACACAATCTACATTGTAAAAGCGCTATACAAATAAAGCTGAATTGAATTGAATTGAATGCAATGACAAAATTATCTAACATGCATTCTCATAATGCATT

## Ra201

5' end TTTGAAAAAGGTGGGACATAATGAATCATGAGTAGATACCTATCAAGGCTCTTCGTCCTGACGGCCTGCACCCAGTCGAGCCGGAGCTGAAC  
\*\*\*\*\*  
hs\_chr8 + TTTGAAAAAGGTGGGACATAATGAATCATGAGTAGATACCTATCAATACATGCATCCTGTCTTTCTGTGCTAGTATTGTTGAAGATAGCT  
\*\*\*\*\*  
3' end ACAATCTACATTGTAAAAGCGCTATACAAATAAAGCTGAATTGAATTGAATTGAATCATGCATCCTGTCTTTCTGTGCTAGTATTGTTGAAGATAGCT

## Ra203

5' end TTGAGTTCCTTGGTACATGCCTAAGATGTGCAGATTTGTTACATAGGTAATAGGAGATGCCAACTTTCTGCACCGGCTTATACTCCAATCC  
\*\*\*\*\*  
hs\_chr1 - TTGAGTTCCTTGGTACATGCCTAAGATGTGCAGATTTGTTACATAGGTAATATTTGCCATGGTGGTTTGCTGCACCTATCAACCTATCACCTA  
\*\*\*\*\*  
3' end ACATTGTAAAAGCGCTATACAAATAAAGCTGAATTGAATTGAATTGAATTGATGCCATGGTGGTTTGCTGCACCTATCAACCTATCACCTA

## Ra205

5' end  
AGACGGGCGGAGAGAAACCCGGGAGGCTAGGGACGGCCTGAAGGCCTTCTTTCATCTGAGAAATATCGCTAAATTACGAAATATGCTA  
\*\*\*\*\*  
hs\_chr12 + AGACGGGCGGAGAGAAACCCGGGAGGCTAGGGACGGCCTGAAGGCCTTCTTTCATCTGAGAAATATCGCTAAATTACGAAATATGCTA  
\*\*\*\*\*  
3' end  
AAGCGCTATACAAATAAAGCTGAATTGAATTGAATTGAATAAGGCGGCAGGGGCGGGCGCAGGCCGGATGTGTTCCGCCCGCTGCGGG

## Ra207

5' end  
TTAAACTCAGTTTGTGGATATCCTCAGGATAACTTGTCTGAGACCTAGACTCTTGTTCACCCACTTAAACATCAGTAACGCAT  
\*\*\*\*\*  
hs\_chr2 + TTAAACTCAGTTTGTGGATATCCTCAGGATAACTTGTCTGAGACCTAGACTCTTGTTCACCCACTTAAACATCAGTAACGCAT  
\*\*\*\*\*  
3' end  
GTAAAAGCGCTATACAAATAAAGCTGAATTGAATTGAATTGAATTTTGTGAGATTGCATTGAATCTGTAGATGAAGTTGGAA

## Ra227

5' end  
CATGTACAACAATACCTTCACAGAGCTAAGAAACCAGGTAAGAGATTACACTGATTGGATCTACAAACGACCCACACCCGTGCGTTTTA  
\*\*\*\*\*  
hs\_chr18 - CATGTACAACAATACCTTCACAGAGCTAAGAAACCAGGTAAGAGATTACACTGATTGGATCTACAAACGACCCACACCCGTGCGTTTTA  
\*\*\*\*\*  
3' end  
AAAAGCGCTATACAAATAAAGCTGAATTGAATTGAATTGAATTGAATACAGCACCTGGGTATAGCACAGAAATAAGAAAAGGCACACTGA

## Ra230

5' end  
GGTATAGAGAGAGTTCAAAACCTAGATTAAAGACCTATCTGTTTAGTAAAGCATACTCAG  
\*\*\*\*\*  
hs\_chr7 + GGTATAGAGAGAGTGAATGAGGTAGGTTTACATAGGGTTAAAAATAAATGTTAATTATGACAAGGCTGTTAAGAAGGATCAAAAGCAGAGAGGAGAGA  
\*\*\*\*\*  
3' end  
CACAACTACATTGTAAAAGCGCTATACAAATAAAGCTGAATTGAATTGAATTGAATTAAATTATGACAAGGCTGTTAAGAAGGATCAAAAGCAGAGAGGAGAGA

### Ra232

5' end CAGTAGCATGATCTCAGCTCACTGCAACCTCTG**GTCCATGCTTTATGACTTCGAGACTGGATTACTGTAATGCTCTATTT**  
\*\*\*\*\*  
hs\_chr15 + CAGTAGCATGATCTCAGCTCACTGCAACCTCTG**CCTCCAGGGT**CAAGTGATTCTTTGCCCTAGCCTCCTGAGTAGCTGT  
\*\*\*\*\*  
3' end **AAGCGCTATACAAATAAAGCTGAATTGAAAAAAAAAATTGAATT**CAAGTGATTCTTTGCCCTAGCCTCCTGAGTAGCTGT

### Ra501

5' end GGTGCATGCCACCAAGCCAGCTAATTTTGTATTTTAG**TAGATTTTATTTAACACCATCTCTAAATTAGCAAATAATCGGTCATCCTTG**  
\*\*\*\*\*  
ucsc\_chr8 + GGTGCATGCCACCAAGCCAGCTAATTTTGTATTTTAG**AGAG**ACGGGGTTTGCCATGTTGGTCAGGCTGAACCTCCTGACCTCAGGTGA  
\*\*\*\*\*  
3' end **AAAGCGCTATACAAATAAAGCTGAATTGAATTGAATTGAAT**AGAGACCGGGTTTGCCATGTTGGTCAGGCTGAACCTCCTGACCTCAGGTGA

### Ra506

5' end GCAATCTACTCGTCTGACAAAGGACTAATATCCAGAATCTACAATGAACTCAAAT**CTCCGGCAGTCGGAGATCCTGAAGAAGGACTTCAGGAGCCTGA**  
\*\*\*\*\*  
UCSC\_hs\_chr6 + GCAATCTACTCGTCTGACAAAGGACTAATATCCAGAATCTACAATGAACTC**AAAT**TTACAAGGAAAAATAAACAACCCCATCAAAAAGTGGGCAAAG  
\*\*\*\*\*  
3' end **ATTGTAAGCGCTATACAAATAAAGCTGAATTGAATTGAATTGAAT**AAATTTACAAGGAAAAATAAACAACCCCATCAAAAAGTGGGCAAAG

### Ra507

5' end GGGAAAGCTTTTCATTCAAGTTTCTCTTAGGTAAGTCTGCTAG**CTTTATTCTCTATTTTCACCTGGGGATACTCAT**  
\*\*\*\*\*  
hs\_chr5 - GAAGAAGCTTTTCATTCAAGTTTCTCTTAGGTAAGTCTGCT**AGATGT**ACAGCAAGAAAAGAAGTCTGCCTTCAGGT  
\*\*\*\*\*  
3' end **GCTATACAAATAAAGCTGAATTGAATTGAATTGAAT**TAGATGTACAGCAAGAAAAGAAGTCTGCCTTCAGGT

### Ra510

5' end CCAGCTAATTTATTTTATTTTTTTTGTAGAGATCGGGTCTCATTATGTAAATCGCTTAAAGTCTACAGGTGTCCAGGGACAGGCTCTA  
\*\*\*\*\*  
UCSC\_chr5 + CCAGCTAATTTATTTTATTTTTTTTGTAGAGATCGGGTCTCATTATGTTGCCAGGCTAGTCTGGAACCTCTGGCCTTAAGCCAACCTC  
\*\*\*\*\*  
3' end AAAGCGCTATACAAATAAAGCTGAATTGAATTGAATTGAATTGTTGCCAGGCTAGTCTGGAACCTCTGGCCTTAAGCCAACCTC

### Ra511

5' end ATCTCATTGTATTGCCAAGCTGGTTTCGAACCTCTGGCCTCAAGCGATCCTTTAGCTCTACTATAAAAGATTGGGTGTCATATTAGACAGCAA  
\*\*\*\*\*  
UCSC\_chr19 - ATCTCATTGTATTGCCAAGCTGGTTTCGAACCTCTGGCCTCAAGCGATCCTTTGCCCTGGCCTTCCAAAGTGTGGGACTACCGGTAGGAGCCAC  
\*\*\*\*\*  
3' end TCTACATTGTAAAGCGCTATACAAATAAAGCTGAATTGAATTGAATTGAATTCTTGCCCTGGCCTTCCAAAGTGTGGGACTACCGGTAGGAGCCAC

### Ra512

5' end CGTGCCTGTCTTCAGATCTTCACAGCACAGTTCCTGGGAAGGAGCTGGGTACTAGCGGCCGCCACCATG  
\*\*\*\*\*  
hs\_chr2 - CGTGCCTGTCTTCAGATCTTCACAGCACAGTTCCTGGGAAGGTGGAGCCACCAGCCTCTCCCTGGTGAG  
\*\*\*\*\*  
3' end AAAGCGCTATACAAATAAAGCTGAATTGAATTGAATTGAAGGTGGAGCCACCAGCCTCTCCCTGGTGAG

### Ra513

5' end TTCAAAAAAAGTTTCTTCCCTTGGAGTTTATGTTACATTAATAATCATGCTATCCATCTCAGATGCAGAAAAGCTAGTCCATGCT  
\*\*\*\*\*  
hs\_chr1 + TTCAAAAAAAGTTTCTTCCCTTGGAGTTTATGTTACATTAATAATCATATACCTCTTGATTACACAAAAACCTGATTTCAAG  
\*\*\*\*\*  
3' end CATTGTAAAGCGCTATACAAATAAAGCTGAATTGAATTGAATAAATAATCATATACCTCTTGATTACACAAAAACCTGATTTCAAG

### Ra514

5' end CTCCCAAAACATTTTTTTTAAATTAACCAGACATAATGACACGTACGCTAATTATTCTCTTTATTCTCTATTTTCACCTGGGGA  
\*\*\*\*\*  
hs\_chr21 + CTCCCAAAACATTTTTTTTAAATTAACCAGACATAATGACACGTACCTGTGGTCCCAGCTGCTTGAAAGCGGAGGTAAAGGGA  
\*\*\*\*\*  
3' end TTGTAAAAGCGCTATACAAATAAAGCTGAATTGAATTGAATTGAATCCTGTGGTCCCAGCTGCTTGAAAGCGGAGGTAAAGGGA

### Ra515

5' end AGCAGCTCTGCTGGACTCTCAGCTTGCTGAATAGTTCGCACCATCTGACTAGCAGGTAAAAATTCACAAAATTCACACTATAGCC  
\*\*\*\*\*  
hs\_chr3 + AGCAGCTCTGCTGGACTCTCAGCTTGCTGAATAGTTAGAAAAGGGGAAAAACCCACACTATTCTAAGCTAGTATGTACAACCCA  
\*\*\*\*\*  
3' end AGCGCTATACAAATAAAGCTGAATTGAATTGAATTGAATTGAATAAAAACCCACACTATTCTAAGCTAGTATGTACAACCCA

### Ra701

5' end AACATCATGTTATACACCATAAATATATATAATTTGCCCATTTACATCTTGCTTATATACACTATGAACAGCAGNTACGC  
\*\*\*\*\*  
UCSC\_chr4 - AACATCATGTTATACACCATAAATATATATAATTTGCCCATTTAAAAAATAAATAAATTTTTAAAAAGAAACCGTAAGT  
\*\*\*\*\*  
3' end CGCTATACAAATAAAGCTGAATTGAATTGAATTGAATTGAATTAAAAAATAAATAAATTTTTAAAAAGAAACCGTAAGT

### Ra705

5' end TGAATTAATCCCTATATCAATTCAAAAATAAAAAATAAATAAATAAAGTAATAAAACAGCAATTATTACTTAT  
\*\*\*\*\*  
hs\_chr3 - TGAATTAATCCCTATATCAATTGTATGCATTATATATTCATTTTTACAACAGATAGATACTAAGCATCTACCATGT  
3262766 1539076  
hs\_chr3 - TTTTATGATCTAAGCACACCATAAACTTGTGAGGAAATGCAGATCAAGGATGGTGCCTCTAATTCAACTGCAATCC  
\*\*\*\*\*  
3' end AAAGCGCTATACAAATAAAGCTGAATTGAATTGAATTGAATGATCAAGGATGGTGCCTCTAATTCAACTGCAATCC

Ra707

5' end

hs\_chr20 -

3' end

```
TGTCCTGACCACACCAGCCTCTTTGCTGATCCCTTGACACAGATCTCGCAACTCAATTACAATTAGAGGGATACAAAGTTAG
*****
TGTCCTGACCACACCAGCCTCTTTGCTGATCCCTTGACACACTCAAGTCCTGCCTCCAGCCTCTGATCTGCTCATCCCTCT
*****
CTATACAAATAAAGCTGAATTGAAAAAAAAAAAAAAAAAACTCAAGTCCTGCCTCCAGCCTCTGATCTGCTCATCCCTCT
```

Ra708

5' end

hs\_chr1 +

3' end

```
TGGTTTGAAACTTTTTGATATACTGGGTTTCATCCTCTGGAGTCCTAAAACCATATATCCCATGTCACAAAACTGCCTTCTTTC
*****
TGGTTTGAAACTTTTTGATATACTGGGTTTCATCCTCTGGAGTCTTACAATGTTTTAGCTAATTACAAAAACAAAACAAAC
*****
AAAAGCGCTATACAAATAAAGCTGAAGTGAATTGAAAAAAATCCTAACAATGTTTTAGCTAATTACAAAAACAAAACAAAC
```

## Nimb2 / DT40 WT cells

### pWG2. 3a

5' end TAAAGAAATGGTTCCTCCTGCTTTCATAAACAGTCATGTGCAGAGTTCGGCAGGGCC**AGATCTCTAGAAGCTGGGTACCAGCTGCTAGCGGAGGA**  
\*\*\*\*\*  
gg\_chr1 - TAAAGAAATGGTTCCTCCTGCTTTCATAAACAGTCATGTGCAG**AGTTCGGCAGGGCCT**GATGCCCCCGGAGCTCGTTCCTTCCCAGCCGATTGAA  
\*\*\*\*\*  
3' end **GTTGCCAACCGCCAGTAAACCCAAGAAGAAGAAGAAGAAG**TTCCGGCAGGGCCTGATGCCCCCGGAGCTCGTTCCTTCCCAGCCGATTGAA

### pWG2. 4a

5' end GACCACCACCTGCACACCACATCCGGGCCTACAAGAACGGAGTCACGGGTTAGAACC**AGTACACTGGGATAACATTGATACAGGTAGACATTTATATAATATAC**  
\*\*\*\*\*  
gg\_chr1 + GACCACCACCTGCACACCACATCCGGGCCTACAAGAACGGAGTCACGGGTT**AGAACCC**CAGAAACCATTCAAGCTGGAAAAGACCTCAGATATCACCCGGTCCAA  
\*\*\*\*\*  
3' end **TAACTCTGGTTGCCAACCGCCAGTAAACCCAAGAAGAAGAAGAAGAA**CCACAGAACCATTCAAGCTGGAAAAGACCTCAGATATCACCCGGTCCAA

### pWG3. 1a

5' end TGGCAAGTTCAGTGAGACTTTGTGGAGAGGAGTATGATTAT**CGTAGGGAATCGTATGAAATCGTAGGGAAGGAAGTATTATAACTCG**  
\*\*\*\*\*  
UCSC\_gg\_chr12 + TGGCAAGTTCAGTGAGACTTTGTGGAGAGG**AGTATGATT**GGCAGGGACAGGAGGGATTAGCATTGCACTCCTGCATCTAAATAAT  
\*\*\*\*\*  
3' end **ACCGCCAGTAAACCCAAGAAGAAGAAG**ATGATTATGGCAGGGACAGGAGGGATTAGCATTGCACTCCTGCATCTAAATAAT

### pWG3. 2a

5' end AAGTTTGCATATGTGCTCTAA**CAAGAGGGTGCAAAGT**TGAAATGTTGCAACTGTGGAGGGGATCATAGCTCAGCGT  
\*\*\*\*\*  
gg\_chr5 + AAGTTTGCATATGTGCTCTAAGAAG**TTCTTA**ACTGTG**TATTGAAT**GTTTCACTCCTGGAGATCGGAGCAGCTTCC  
\*\*\*\*\*  
3' end **GTCTGGTTGCCAACCGCCAGTAAACCCAAGAAGAAGAAG**TTTCACTCCTGGAGATCGGAGCAGCTTCC

pWG3. 3a

5' end

TCTTAGAAGAAGAAAAGTGAGAAAACACAGAATTAGTCATAGAGTCATAGAATCATACCCAGTTAGAGGAAAGAATATAGAGAGCGGCGCGG  
\*\*\*\*\*

UCSC\_gg\_chr2 -

TCTTAGAAGAAGAAAAGTGAGAAAACACAGAATTAGTCATAGAGTCATAGAATCATAGAATGGCCTGGGTTGAAAAGGACCACAATGATCAT  
\*\*\*\*\*

3' end

TGGTTGCCAACCGCCAGTAAACCCAAAGAAGAAGAAGAAGTCATAGAATCATAGAATGGCCTGGGTTGAAAAGGACCACAATGATCAT

pWG4. 5a

5' end

TTCATCAAGTCAGAGGTATGCTTCAGCACTTCAGAGAGAGAAACCTCAGCAGCTGCAGGGATAGATCTCTAGAAGCTGGGTACCAGCTGCTAGCGGAGG  
\*\*\*\*\*

gg\_chr20 -

TTCATCAAGTCAGAGGTATGCTTCAGCATTTTCAGAGAGAGAAACCTCAGCAGCTGCAGGGATGGGGAGGGACAAACAGATTCTTAAGCAGAAAAGAGGAA  
\*\*\*\*\*

3' end

TCTGTTGCCAACCGCCAGTAAACCCAAAGAAGAAGAAGAAGAAGCTGCAGGGATGGGGAGGGACAAACAGATTCTTAAGCAGAAAAGAGGAA

pWG5. 1b

5' end

GTTCTGTGCTTTTAGCATGTTTTGTTTTCTTTTCAGGTAACCTTTGAAAAGAGATCTCTAGAAGCTGGGTACCAGCTGCTAGCGGAGGATGGCA  
\*\*\*\*\*

gg\_chr4 +

GTTCTGTGCTTTTAGCATGTTTTGTTTTCTTTTCAGGTAACCTTTGAAAAGAGATCTCTAGAAGCTGGGTACCAGCTGCTAGCGGAGGATGGCA  
\*\*\*\*\*

3' end

CGCCAGTAAACCCAAAGAAGAAGAAGAAGAAGAAGACTTTGAAAAGCAGTATGATGATGTGACAATCAAATGATCTTTGCAATTGTTT

pWG5. 2a

5' end

TGAAAAAATGTAAATCAGCTTATGTCCCTTTGAGATCTCTAGAAGCTGGGTACCAGCTGCTAGCGGAGGATGGCAAGGCGGA  
\*\*\*\*\*

gg\_chr2 -

TGAAAAAATGTAAATCAGCTTATGTCCCTTTGTCTATAAAGGGAAGTGAAGTATGAGCATACCTGTGTTTGAATTCAGA  
\*\*\*\*\*

3' end

CACCTATAAGTCTGGTTGCCAACCGCCAGTAAACCCAAAGAAGAAGAAGAAGAGCATACCTGTGTTTGAATTCAGA

pWG5. 3a

5' end AGCAAGACAGACATGTTGGGAGAAATTTCTGATTCTAGATAGATAACATCTTTCA<sup>TT</sup>GAAGGGCAAATCAGTATATTCATTGGGTCCTG  
\*\*\*\*\*  
gg\_chr1 + AGCAAGACAGACATGTTGGGAGAAATTTCTATTCTAGATAGATAACATCTTTGTGTTTCATGAATATATGAGCAATATGGTGACATTCCTGCA  
\*\*\*\*\*  
3' end GCCAACCGCCAGTAAACCCAAAGAAGAAGAAGAAGAAGATTAACATCTTTGTGTTTCATGAATATATGAGCAATATGGTGACATTCCTGCA

pWG5. 4a

5' end AGGTCAGTCAAAACCTCACAGCACAAAAATTTCACTTCAGCCCAGTAATCCACCAGTTTCATCTATGCAGGTTGAAATGGGAGAAATGCCCTTAAG  
\*\*\*\*\*  
gg\_chr5 - AGGTCAGTCAAAACCTCACAGCACAAAAATTTCACTTCAGCCCAGTAATCCACCAGTTTCATCTATGCAGGTTGAAATGGGAGAAATGCCCTTAAG  
\*\*\*\*\*  
3' end GTCTGGTTGCCAACCGCCAGTAAACCCAAAGAAGAAGAAGAAGTAATCCACCAGGAACTACAAAGCGCTTTGTCTTTAGTAGAATGTTTACTC

pWG5. 5a

5' end CTACACCAAAGGCTGGATCAGTACTGCTAATTTGGATCCCAGTAACATACCACAAAGATTAAGGGATATAATATAGTTAGAAATGATAGGAATC  
\*\*\*\*\*  
gg\_chr2 - CTACACCAAAGGCTGGATCAGTACTGCTAATTTGGATCCCAGTAAACATACCACAAAGAGAGAGAGGTGCGAAATCCAGTTCACCTTATTGACCC  
\*\*\*\*\*  
3' end CTGTTGCCAACCGCCAGTAAACCCAAAGAAGAAGAAGAAGTAACATACCACAAAGAGAGAGGTGCGAAATCCAGTTCACCTTATTGACCC

pWG6. 3a

5' end ACCGGCAGCGCGCCTGCGCCGGGCCGAGCGGGGCCGCGAGAGGGCTCGGGCTGCGGGCTGCAGATCTCTAGAAGCTGGGTACCAGCTGCTAGCGGAGGATGGCAAGG  
\*\*\*\*\*  
gg\_chr9 + ACCGGCAGCGCGCCTGCGCCGGGCCGAGCGGGGCCGCGAGAGGGCTCGGGCTGCGGGCTGCAGATCTCTAGAAGCTGGGTACCAGCTGCTAGCGGAGGATGGCAAGG  
\*\*\*\*\*  
3' end TCTGTTGCCAACCGCCAGTAAACCCAAAGAAGAAGAAGAAGAGCTGCGGGCTGCGGGCTGCGGGGCCGCGGCCCCACACATCCTGCACGCCCTCTGCTGA

pWG7. 2a

5' end

AGCACTCAACAATGCCATACAGGATCTTGTAATGTAATGACAAAAATGTAATCATGTTAAACGTTCTACAATGGAATGCAAGGAGCTTAATTGCGAAT  
\*\*\*\*\*

gg\_chr3 +

AGCACTCAACAATGCCATACAGGATCTTGTAATGTAATGACAAGAAATGTAATGCAATTTTGTCTAGGAAGACAGCCTATCTACGATTGATAATTTCTTC  
\*\*\*\*\*

3' end

TTGCCAACCGCCAGTAAACCCAAGAAGAAGAAGAAGAAGAAATGTAATCATTTTGTCTAGGAAGACAGCCTATCTACGATTGATAATTTCTTC

pWG7. 5a

5' end

GCAATAATGGTAGAAAGTGCTTGTAATCTGCAATTTTCTCAGGCCAGTTCTTCCAGGAGATCTCTAGAAGCTGGGTACCAGCTGCTAGCGGAGGATGGCAA  
\*\*\*\*\*

gg\_chr2 -

GCAATAATGGTAGAAAGTGCTTGTAATCTGCAATTTTCTCAGGCCAGTTCTTCTTATGCCAAGCATCCTTTAACTTGAAGGCTATTGT  
\*\*\*\*\*

3' end

AAGTCTGGTTGCCAACCGCCAGTAAACCCAAGAAGAAGAAGAAGAGTTTCTTCCAGGCTCTTCTTATGCCAAGCATCCTTTAACTTGAAGGCTATTGT

pWG7. 6a

5' end

GCGGGGCTGCCCCGGGGCGGGGTGGCGGGGACTATAAAGAGCCGCTCCCGATTACCCCACTGGGCAATGTATACATTGTAATCAACAAGAAACAATAGAACATATT  
\*\*\*\*\*

gg\_chr7 -

GCGGGGCTGCCCCGGGGCGGGGTGGCGGGGACTATAAAGAGCCGCTCCCGGGGAGCGGGGCTGTGCGCTCGGTGCAGCTGCGCTCGTGGCGCTCGGACGGCCCGG  
\*\*\*\*\*

3' end

CTATAAGTCTGGTTGCCAACCGCCAGTAAACCCAAGAAGAAGAAGAAGAGGAGCGGGGCTGTGCGCTCGGTGCAGCTGCGCTCGTGGCGCTCGGACGGCCCGG

pWG8. 1a

5' end

GCAATATTGGACAGAAAAACGTGACATAGCAATTTGCAGTGAGTTGAGAACTGTATAGATCTCTAGAAGCTGGGTACCAGCTGCTAGCGGAGGATGG  
\*\*\*\*\*

gg\_chr2 -

GCAATATTGGACAGAAAAACGTGACATAGCAATTTGCAGTGAGTTGAGAACTGTATAGAACTGTATCAAAATAGACTGTTACAGACTGAAAGGTGCGAACAGCTTTGT  
\*\*\*\*\*

3' end

TTGCCAACCGCCAGTAAACCCAAGAAGAAGAAGAAGAAGAGAACTGTATCAAAATAGACTGTTACAGACTGAAAGGTGCGAACAGCTTTGT

pWG8. 2a

5' end TTCTCCAGCTTATTGAAATCCATGCAATTATTGACCTTCTTCTCCATTAATCCATCACTACAAAATATATACTGGGCCCTCATGAGATCTGTTTTGATTATGGAT  
\*\*\*\*\*  
gg\_chr2 - TTCTCCAGCTTATTGAAATCCATGCAATTATTGACCTTCTTCTCCATTAATCCAACCTGAATGTCTACTTTAGGAGACATTCTGACATTTATCTTTAA  
\*\*\*\*\*  
3' end TGCACCTATAAGTCTGGTTGCCAACCGCCAGTAAACCCAAAGAAGAAGAAGAAGAACTGAATGTCTACTTTAGGAGACATTCTGACATTTATCTTTAA

pWG8. 3a

5' end AGGGCTTCTGAAGTCTGCCACAAACAACTGGGAAGGTCTATTGTGCTCACACTGGACACTGGAATCATACATTACATAAAATAGG  
\*\*\*\*\*  
gg\_chr4 + AGGGCTTCTGAAGTCTGCCACAAACAACTGGGAAGGTCTATTGTGACTTCTGATAAGAATTTATTTACCTCAATTAATTTTCAGGC  
\*\*\*\*\*  
3' end CAACCGCCAGTAAACCCAAAGAAGAAGAAGAAGGTCTATTGTGACTTCTGATAAGAATTTATTTACCTCAATTAATTTTCAGGC

pWG9. 2a

5' end TATCAAGCATTGCACAGGTAGTCATTTATCCCAAGTGGATTATCTTTCTTTGCAAGAATGGGCAATAAATGGGGATTCAAATCTGTTGCAAAAACCTCAGGTCACT  
\*\*\*\*\*  
gg\_chr3 - TATCAAGCATTGCACAGGTAGTCATTTATCCCAAGTGGATTATCTTTCTTTGCAAGGTCTCTGGATAGAAGCATAGAAGTTTGTAGTTTCTTTCCCTAAAAACAA  
\*\*\*\*\*  
3' end ACCTATAAGTCTGGTTGCCAACCGCCAGTAAACCCAAAGAAGAAGAAGAAGATTCCTCTGGATAGAAGCATAGAAGTTTGTAGTTTCTTTCCCTAAAAACAA

pWG9. 3a

5' end CTGGTGGATGAAAAGCTGGACATGAGCCAGCAGTATGTGCCTATAGCCTGGAAGGTCAACAGGAAAGAATATAGAGAGCGGCGCGCACAACGACCCAACCCGTGC  
\*\*\*\*\*  
gg\_cbr3 + CTGGTGGATGAAAAGCTGGACATGAGCCAGCAGTATGTGCCTATAGCCTGGAAGGTCAACAGTATTTGGGCAGCATCAAAGAGGGATGGCGGGAGGGTGAGGGAGGT  
\*\*\*\*\*  
3' end ATAAGTCTGGTTGCCAACCGCCAGTAAACCCAAAGAAGAAGAAGAAGAGGTCAACAGTATTTGGGCAGCATCAAAGAGGGATGGCGGGAGGGTGAGGGAGGT

pWG10. 1a

5' end GGATGATCCCGCGGGTCTTTTCCAACCTTAGCGATTCTATGATTCTATGATAAGCCATTAGATCTCTAGAAGCTGGGTACCAGCTGCTAGCGGAGGATGGCAAGGC  
\*\*\*\*\*  
gg\_chr4 - GGATGATCCCGCGGGTCTTTTCCAACCTTAGCGATTCTATGATTCTATGATAAGCCATTAGATCTCTAGAAGCTGGGTACCAGCTGCTAGCGGAGGATGGCAAGGC  
\*\*\*\*\*  
3' end ACCTATAAGTCTGGTTGCCAACCGCCAGTAAACCCAAAGAAGAAGAAGATAAGCCATTAGGTAGCTATGAAAAAGTTCATGTTACAAGCCATGCTGATTTTGACT

pWG10. 3a

5' end AATAGGAGCGCGGGAGGGTATTTAAAAGCAACCGCGCGGCGAGGCAGCAGTTGAGATCTCTAGAAGCTGGGTACCAGCTGCTAGCGGAGGATGGCAAG  
\*\*\*\*\*  
gg\_chr10 - AATAGGAGCGCGGGAGGGTATTTAAAAGCAACCGCGCGGCGCGAGGCAGCAGTTGAGATCTCTAGAAGCTGGGTACCAGCTGCTAGCGGAGGATGGCAAG  
\*\*\*\*\*  
3' end GGTGCCAACCGCCAGTAAACCCAAAGAAGAAGAAGAAGAGGCAGCAGTTGGTGGTCTTCTCGCGGCCGAGGCGTGTGTTGTAGAGCGGCGCAA

pWG11. 2a

5' end TGCTAAATGGCCAAAGAGGTAAACACGTTGCGTTTGCTATAGATGAAGTCAATCAGTATATCAGAGTGGGTTCCGCAGAGGCAGAAATACTATGGACTCAG  
\*\*\*\*\*  
gg\_chr1 - TGCTAAATGGCCAAAGAGGTAAACACGTTGCGTTTGCTATAGATGAAGTCAATCAGTATATCAGAGTGGGTTCCGCAGAGGCAGAAATACTATGGACTCAG  
\*\*\*\*\*  
3' end TCTGGTTGCCAACCGCCAGTAAACCCAAAGAAGAAGAAGAAGATCAATCAGTACATAGTTTGTGCTTACGGGTTTATAAGCTAGGACAGAAGCA

pWG12. 2a

5' end CTATTATTGCTAGCCTTTATGTTATTTTCAGTCACGATGGAGAAAAGCACTGATGGAGATCAGCATTACATTGGCAGGTTTATTAGGAAACA  
\*\*\*\*\*  
gg\_chr12 + CTATTATTGCTAGCCTTTATGTTATTTTCAGTCACGATGGAGAAAAGCACTGATGGAGATCAGCATTACATTGGCAGGTTTATTAGGAAACA  
\*\*\*\*\*  
3' end GCCAACCGCCAGTAAACCCAAAGAAGAAGAAGAAGAGAAAAGCACTGACAGACTCCGCTGGCTTTGCAGGGGCTGTGATGCCCCATCCC

pWG13. 1a

5' end

AGACTTTGAAAAATCCTTGAATTGCTGTGACACTGACGAAGTAATCTAATAAAAAGGTTCCAGAAATTATGACTGTGTCTAAACAAATGAAACAGGAA  
\*\*\*\*\*

gg\_chr13 +

AGACTTTGAAAACTCCTTGAATTGCTGTGACACTGACGAAGTAATCTAATATTGGTTGCTGAAGTGTGTTACCCACAGGAGTGTAGTCACGGTTGAG  
\*\*\*\*\*

3' end

ACCTATAAGTCTGGTTGCCAACCGCCAGTAAACCCAAGAAGAAGAAGATTGGTTGCTGAAGTGTGTTACCCACAGGAGTGTAGTCACGGTTGAG

pWG13. 2a

5' end

GCCCGGCGCGCTCCGTCGTTTTAAAGCCTCCCGCGCTCGCTGCTCCCGGCTGCAGATCTCTAGAAGCTGGGTACCAGCTGCTAGCGGAGGATGGCAA  
\*\*\*\*\*

gg\_chr18 -

GCCCGGCGCGCTCCGTCGTTTTAAAGCCTCCCGCGCTCGCTGCTCGGCGCGCTCCCGCCGGATCGGGGTTCTTTGGCTCAGGCC  
\*\*\*\*\*

3' end

GCCAACCGCCAGTAAACCCAAGAAGAAGAAGAAGATGCTCCCGGCTGTGCTCGGCGCGCTCCCGCCGGCTCGGGGTTCTTTGGCTCAGGCC

pWG14. 1a

5' end

GCGCGGGGCCCGCCGCTATATGAGCTCCGCCCGCGCTGACTCGGCCCTTGAGATCTCTAGAAGCTGGGTACCAGCTGCTAGCGGAGGATGGCAAGG  
\*\*\*\*\*

UCSC\_gg\_chr1 -

GCGCGGGGCCCGCCGCTATATGAGCTCCGCCCGCGCTGACTCGGCCCTTCCGCCCTCGCTCCCGCCGCTCTCGGGTCGCTGCGCAGAGAGCCGCG  
\*\*\*\*\*

3' end

CAACCGCCAGTAAACCCAAGAAGAAGAAGAAGAAGACTCGGCCCTTCCGCCCTCGCTCCCGCCGCTCTCGGGTCGCTGCGCAGAGAGCCGCG

pWG14. 2a

5' end

ATGCTACCATGCCAAAAGCTTCTACCAGAAACCTTGGATGTTTTACAAGAAGGAACATCTATGCAGGTTGAAATGGGAGAAATGCCCTTAAGCATTAGGAG  
\*\*\*\*\*

gg\_chr2 -

GCAACTTTTGTATAAAGCTTCTACCAGAAACCTTGGATGTTTTACAGAAGGAACATTGGCTAAGGCTGCAACATAAAAAATGTGGTATATGATTCCCAT  
\*\*\*\*\*

3' end

AAGTCTGGTTGCCAACCGCCAGTAAACCCAAGAAGAAGAAGAAGAAGGAAACATTGGCTAAGGCTGCAACATAAAAAATGTGGTATATGATTCCCAT

pWG15. 1a

5' end

gg\_chr15 +

3' end

```
CTGAAGGGTGGGCAGGGAGGGATGGATATGAAAGCTGAGGGTTTTTTTGTGGCAGACAAAAGAGCAATCTTCAGCATTTTACATTGGCAGGTTTATTAGGAAACAAATCTA
*****
CTGAAGGGTGGGCAGGGAGGGATGGATATGAAAGCTGAGGGTTTTTTTGTGGCAGACAAATAGGTATTGTTACAAAATTCGGAAAGCTTCCCACTGCTGATAGGCACTGGC
*****
TGCACCTATAAGTCTGGTTGCCAACCGCCAGTAAAACCCAAGAAGAAGAAGAAATAAGGTATTGTTACAAAATTCGGAAAGCTTCAAAGTAATTCAGTGTTTTAT
```

pWG16. 1a

5' end

gg\_chr8 +

3' end

```
ACCTGCACTGCTCCAGTTTTGAGAGGTCGTGAGG-TTTTTTAATCCAGAATAAGTTGGCAAGTACACTGGGATAACATTGATACAGGTAGACATTTATAT
*****
ACCTGCACTGCTCCAGTTTTGAGAGGTCGTGAGGTTTTTTTAATCCAGAATAAGTTCCTTTTAAATAAATATGGGATGTAGGTAATGGGGTTGTACGGGA
*****
TATAAGTCTGGTTGCCAACCGCCAGTAAAACCCAAGAAGAAGAAGAAGATTCCTTTTAAATAAATATGGGATGTAGGTAATGGGGTTGTACGGGA
```

### L1.3 inversion/ HeLa-RC cells

#### pHLE2. 1a

5' end GCATTTATCTGGTACTATTGTTTTGTAGGTTTTAGTTTAGAAAGTCAGACTGCATAAATGCTCTCTTTGAGAAGTGTCTGTTTCATGTCCT  
\*\*\*\*\*  
hs\_chr5 - GCATTTATCTGGTACTATTGTTTTGTAGGTTTTAGTTTAGAAAGTCAGACTGAAAGTACTAAAAGTTGTCATGCGTCCGTGTGAAGAGAC  
\*\*\*\*\*  
3' end AAAAAAAAAAAAAAAAAAAAAAAAAAAAAAAAAAAAAGAAAGTCAGACTGAAAGTACTAAAAGTTGTCATGCGTCCGTGTGAAGAGAC

#### pHLE3. 8a

5' end CAACATAAGCCATAAATGCAAGCCGCAGAAAGTACATGTTAAAATAACCAAAAGAGAAGTGTCTGTTTCATGTCCTTCGCCACTTTTTGATGGGGTTGT  
\*\*\*\*\*  
hs\_chr9 - CAACATAAGCCATAAATGCAAGCCGCAGAAAGTACATGTTAAATTAACCAAAAGAACAGGTGACCTTCCTTTAACTAATATATTTTCATTTAACCCAGT  
\*\*\*\*\*  
3' end AAAAAAAAAAAAAAAAAAAAAAAAAAAAAAAAAAAAATAAATAACCAAAAGAACAGGTGACCTTCCTTTAACTAATATATTTTCATTTAACCCAGT

#### pHLE3. 11a

5' end TTAGCAACACATCTGGAATTCAGAAAATTAGAATGTGACAGAAGAGGCATGTAGGTTTCCTGAATACAGCACACTGATGGGTCTTGACTCTTT  
\*\*\*\*\*  
hs\_chr7 + TTAGCAACACATCTGGAATTCAGAAAATTAGAATGTGACAGAAGAGGCATGTAGGTTTCCTGAATACAGCACACTGATGGGTCTTGACTCTTT  
\*\*\*\*\*  
3' end AAAAAAAAAAAAAAAAAAAAAAAAAAAAAAAAAAAAAGAAGAGGCATGTAGGTTTCCTGAATACAGCACACTGATGGGTCTTGACTCTTT

#### pHLE4. 2a

5' end CAGAATTTGGGAGACTCAAAAAATCAGCATAAATTGTAAGGGATTGTACAGATGGGTTTCGGGTGATAGTGTCTTTCTGGTTGTTAGTTT  
\*\*\*\*\*  
hs\_chr8 + CAGAATTTGGGAGACTCAAAAAATCAGCATAAATTGTAAGGGATTGTACAGATGGGTTTCGGGTGATAGTGTCTTTCTGGTTGTTAGTTT  
\*\*\*\*\*  
3' end AAAAAAAAAAAAAAAAAAAAAAAAAAAAAAAAAAAAATTGTAAGGGATTTCAAGAAGACTGACTTAGGCCTAAGCTCATCATTGCACAATGCTT

pHLE4. 5a

5' end CTTTGAGATTGAGTACAATAGAGTCCAATTTAAAACTACTTGGAAACAAAAAACCCACCGCTACCAGCGGTGGTTGTTTGCCGGATCAA  
\*\*\*\*\*  
hs\_chr5 - CTTTGAGATTGAGTACAATAGAGTCCAATTGAACTACTTGGGAAAAAATATTTGAAATTTCTCACTTGAAAACATAACTCTTCTTTA  
\*\*\*\*\*  
3' end AAAAAAAAAAAAAAAAAAAAAAAAAAAATAAAACTACTTGGGAAAAAATATTTGAAATTTCTCACTTGAAAACATAACTCTTCTTTA

pHLE2. 6a

5' end GCCACTACGGAAACAGTGTGGAGATTCCTTAAGAACTAAAAGTAGAGGAATGTATCCATTTCTTCTAGATTTCTAGTTATTG  
\*\*\*\*\*  
hs\_chr16 + GCCACTACGGAAACAGTGTGGAGATTCCTTAAGAACTAAAAGTAGAACTACCATTTGATCCAGCAATCCCACTACTGGGTATCCA  
\*\*\*\*\*  
3' end AAAAAAAAAAAAAAAAAAAAAAAAAAAAGAACTAAAAGTAGAACTACCATTTGATCCAGCAATCCCACTACTGGGTATCCA

pHLE4. 9a

5' end ACTTTACAAGAGGTCTTTAAGGAGTGCTAAACATGAAATGAAAGACCATATGTATACATGTGCCATGCTGGTGCGCTGCACCCACTAATGT  
\*\*\*\*\*  
hs\_chr2 - ACTTTACAAGAGGTCTTTAAGGAGTGCTAAACATGAAATGAAAGACCATATGTATACATGTGCCATGCTGGTGCGCTGCACCCACTAATGT  
\*\*\*\*\*  
3' end AAAAAAAAAAAAAAAAAAAAAAAAAAAAGAAAGACCATTACTGGCCACCAAAAAACAACAAACAAACAACTTAAATA

pHLE5. 16a

5' end GGTTTGTCTAAAAATTTGGAGTAAGCAGGAAGGAATGTTTAAAGTTAAGATAAGGATAACCGTATTACCGCCATGCATCTGGAATTCGGCTTACGG  
\*\*\*\*\*  
hs\_chrX + GGTTTGTCTAAAAATTTGGAGTAAGCAGGAAGGAATGTTTAAAGTTAAGATAAGGATAACCGTATTACCGCCATGCATCTGGAATTCGGCTTACGG  
\*\*\*\*\*  
3' end AAAAAAAAAAAAAAAAAAAAAAAAAAAAAGTTAAGATAAGGAAGTCTGTTAATCAATACACTGGGTCAGAGTGACCTGTAGG

pHLE6. 19a

5' end TCTCACACTGTTAAACCTTCCTTTTGATTGAGAAGTTTGAAGTCTCTTTTGGAGGCCTAGGCTTTGCAACGCGTCTGCAGCACG  
\*\*\*\*\*  
hs\_chr11 - TCTCACACTGTTAAACCTTCCTTTTGATTGAGAAGTTTGAAGTCTCTTTTATAGAATCTCCAATGGATATTTTGAGGGCTTTGA  
\*\*\*\*\*  
3' end AAAAAAAAAAAAAAAAAAAAAAAAAAAAAAAAGAAATCTCTTTTATAGAATCTCCAATGGATATTTTGAGGGCTTTGA

pHLE7. 8a

5' end ATTCGCAGCATACAACTGGTCTAAGTGAACATATAAAATAGAAATTGCTCACATGTTCTTCCTGCGTTATCCCTGATTG  
\*\*\*\*\*  
hs\_chr5 - ATTCGCAGCATACAACTGGTCTAAGTGAACATATAAAATAGAAATTGCTCAAGGCTGAATATAATCCTGATATAGCAGTC  
\*\*\*\*\*  
3' end AAAAAAAAAAAAAAAAAAAAAAAAAAAAAAAATAAAAATAGAAATTGCTCAAGGCTGAATATAATCCTGATATAGCAGTC

pHLE7. 20b

5' end CATTAGCCATACCTAGAATGTCAAATGGTCTCTCTTTAACTGGAATGAAAAAGAGGTTTACTTGCTTTAAAAACCTCCACACCTCCCGCTG  
\*\*\*\*\*  
hs\_chr5 + CATTAGCCATACCTAGAATGTCAAATGGTCTCTCTTTAACTGGAATGAAAGAGATGAAAGAACTGTGTACCAGGAGGGCACTGTAACCTATGA  
\*\*\*\*\*  
3' end AAAAAAAAAAAAAAAAAAAAAAAAAAAAAAAAGAAAGAGATGAAAGAACTGTGTACCAGGAGGGCACTGTAACCTATGA

pHLE8. 12a

5' end TCAATCGAGGTAATAAAGAAATAAATTAACAAATAACAAATATATTGAAGTCAGGTAGTGTGATGCCTCCAGC  
\*\*\*\*\*  
hs\_chr11 + TCAATCGAGGTAATAAAGAAATAAATTAACAAATAAACAATATATTGATAGATTAATAATAGAAAGATATACCT  
\*\*\*\*\*  
3' end AAAAAAAAAAAAAAAAAAAAAAAAAAAAAAAACAATATATTGATAGATTAATAATAGAAAGATATACCT

pHLE8. 25a

5' end ATACAGGACCCCATTTCTGTGGGCACTGGATGAAAGACATGGGTTTAAACTTCATTTTTTAATTTAAAGGATCTAGG  
\*\*\*\*\*  
hs\_chr5 - ATACAGGACCCCATTTCTGTGGGCACTGGATGAAAGACATGGGTTTATCTTGTGCCAAGGCCAAGGCTATTTTAAATATT  
\*\*\*\*\*  
3' end AAAAAAAAAAAAAAAAAAAAAAAAAAAAAAAAGAAAGACATGGGTTTATCTTGTGCCAAGGCCAAGGCTATTTTAAATATT
