# Supplementary material for: Integrated mechanism for the generation of the 5′ junctions of LINE inserts
Source: Oxford University Press journal article supplement (doi:10.1093/nar/gku1067), 2014-11-06
Supplement: gku1067_Supplementary_Data.zip [file gku1067_Supplementary_Data.zip › nar-02442-v-2014-File006.xlsx]

## Sheet: Table S3
	Supplemental Table S3 Summary of LINE inserts in cultured cells.
	Clones	LINE	Cell	LR	IL	5´ MH ( bp )	5´ EX ( bp )	3´ MH ( bp )	3´ EX ( bp )	TSA ( bp )	Chr.	Direction	Position	Comment
	pWLE23.1a	L1.3	DT40 WT	An	8236	3	0	2	0	14	24	+	3225377
	pWLE25.1a	L1.3	DT40 WT	An	8238	0	0	2	0	11	2	+	72624351
	pWLE25.2a	L1.3	DT40 WT	An	8235	0	0	1	0	16	20	-	5095026
	pWLE25.3a	L1.3	DT40 WT	An	8235	0	0	2	0	15	1	+	75750183
	pWLE25.4a	L1.3	DT40 WT	An	8236	0	0	2	0	15	1	-	61623126
	pWLE27.7a	L1.3	DT40 WT	An	8235	*	*	*	*	*	4	-	44294761
	pWLE28.3a	L1.3	DT40 WT	An	8235	0	0	5	0	-32737	4	+	5016533
	pWLE28.5a	L1.3	DT40 WT	An	2250	0	0	1	0	15	20	-	5794983
	pWLE28.8a	L1.3	DT40 WT	An	4736	0	0	4	0	15	1	+	143556465
	pWLE30.5a	L1.3	DT40 WT	An	8235	0	0	0	0	15	2	-	134013415
	pWLE34.2a	L1.3	DT40 WT	An	4374	0	0	0	0	15	1	+	139303632
	pWLE34.3a	L1.3	DT40 WT	An	4132	3	0	1	0	17	3	-	72061595
	pWLE34.4a	L1.3	DT40 WT	An	2454	0	0	0	0	15	1	+	60201654
	pWLE34.5a	L1.3	DT40 WT	An	8235	0	0	0	0	10	5	+	58834606
	pWLE34.7a	L1.3	DT40 WT	An	8236	3	0	5	0	15	1	-	99439776
	pWLE35.1a	L1.3	DT40 WT	An	6734	0	0	3	0	13	1	+	45978730
	pWLE35.2a	L1.3	DT40 WT	An	2222	0	0	0	0	17	1	-	159097841
	pWLE35.3a	L1.3	DT40 WT	An	8235	0	0	2	0	12	4	-	36760632
	pWLE35.5a	L1.3	DT40 WT	An	8235	0	0	0	0	11	Z	+	10602247
	pWLE35.7a	L1.3	DT40 WT	An	3219	0	0	1	0	16	4	-	1449196
	pWLE35.8a	L1.3	DT40 WT	An	6042	1	0	6	0	17	2	-	76972240
	pWLE35.9a	L1.3	DT40 WT	An	8235	0	0	2	0	11	1	-	62334731
	pWLE36.1a	L1.3	DT40 WT	An	8235	0	0	3	0	12	1	-	11371195
	pWLE36.2a	L1.3	DT40 WT	An	8236	3	0	2	0	13	12	-	1910914
	pWLE36.5a	L1.3	DT40 WT	An	8235	1	0	2	0	15	5	-	38756270
	pWLE36.6a	L1.3	DT40 WT	An	6576	1	0	2	0	15	2	+	44445952
	pWLE36.7a	L1.3	DT40 WT	An	2611	1	0	0	0	16	11	+	3425508
	pWLE36.8a	L1.3	DT40 WT	An	4554	0	0	6	0	17	7	+	17905368
	pWLE36.9a	L1.3	DT40 WT	An	7243	3	0	2	0	12	2	+	33389906
	pWLE36.12a	L1.3	DT40 WT	An	8235	0	0	5	0	15	1	-	92147807
	pWLE36.10a	L1.3	DT40 WT	An	8235	2	0	2	0	17	1	-	46255029
	pWLE36.13a	L1.3	DT40 WT	An	8235	0	0	1	0	16	1	+	183124051
	pWLE36.14a	L1.3	DT40 WT	An	8235	0	0	0	0	13	1	+	52483201
	pWLE36.16a	L1.3	DT40 WT	An	8235	0	0	2	0	19	2	+	48979032
	pWLE36.20a	L1.3	DT40 WT	An	8235	0	0	2	0	12	2	-	125547059
	p7LE13.1a	L1.3	DT40 Ku70-/-	An	2684	1	0	5	0	15	4	-	18206346
	p7LE13.2a	L1.3	DT40 Ku70-/-	An	8234	0	0	1	0	16	2	+	137959525
	p7LE13.3a	L1.3	DT40 Ku70-/-	An	8235	0	0	4	0	16	18	-	7704300
	p7LE13.5a	L1.3	DT40 Ku70-/-	An	8236	2	0	7	0	18	2	-	95658631
	p7LE13.6a	L1.3	DT40 Ku70-/-	An	2242	0	2	5	0	13	9	-	17241776
	p7LE14.1a	L1.3	DT40 Ku70-/-	An	3557	0	0	1	0	16	8	+	3519554
	p7LE14.2a	L1.3	DT40 Ku70-/-	An	4019	4	0	4	0	17	10	-	13239916
	p7LE14.3a	L1.3	DT40 Ku70-/-	An	4576	1	0	2	0	16	12	-	14623953
	p7LE14.4a	L1.3	DT40 Ku70-/-	An	8235	1	0	0	0	14	11	-	10437145
	p7LE14.5a	L1.3	DT40 Ku70-/-	An	3650	0	0	5	0	16	3	+	9428477
	p7LE14.6a	L1.3	DT40 Ku70-/-	An	2701	0	0	4	0	16	9	-	25387660
	p7LE15.1a	L1.3	DT40 Ku70-/-	An	3830	0	0	0	0	14	2	-	109072699
	p7LE15.2a	L1.3	DT40 Ku70-/-	An	2166	0	0	0	0	15	12	+	3983982
	p7LE15.3a	L1.3	DT40 Ku70-/-	An	6386	0	0	5	0	14	2	-	137960349
	p7LE15.4a	L1.3	DT40 Ku70-/-	An	2341	2	0	5	0	13	1	+	70209170
	p7LE15.5a	L1.3	DT40 Ku70-/-	An	8236	2	0	2	0	11	4	-	44758241
	p7LE15.6a	L1.3	DT40 Ku70-/-	An	2192	2	0	2	0	19	7	-	33829319
	p7LE16.1a	L1.3	DT40 Ku70-/-	An	3820	2	0	4	0	15	2	-	16190585
	p7LE16.2a	L1.3	DT40 Ku70-/-	An	8235	0	0	5	0	12	5	+	20628621
	p7LE16.4a	L1.3	DT40 Ku70-/-	An	2311	0	0	5	0	13	6	+	20010622
	p7LE18.2a	L1.3	DT40 Ku70-/-	An	8235	0	0	2	0	10	2	-	48941915
	p7LE18.6a	L1.3	DT40 Ku70-/-	An	8235	0	1	0	0	15	2	-	130125877
	p7LE19.1a	L1.3	DT40 Ku70-/-	An	8235	0	0	2	0	11	1	+	28353431
	p7LE19.3a	L1.3	DT40 Ku70-/-	An	2147	1	0	0	0	20	3	-	99341940
	p7LE19.6a	L1.3	DT40 Ku70-/-	An	7512	0	0	0	0	14	3	+	1502528
	pHLE1.2a	L1.3	HeLa-RC	An	8235	0	0	2	0	12	4	-	174264167
	pHLE1.4a	L1.3	HeLa-RC	An	3306	0	0	12	0	15	2	+	50237288
	pHLE1.5a	L1.3	HeLa-RC	An	2408	0	0	3	0	-1	3	+	140095592
	pHLE1.6a	L1.3	HeLa-RC	An	2272	6	0	4	0	-9	17	+	70254859
	pHLE2.3a	L1.3	HeLa-RC	An	2529	0	4	7	0	Translocation	3	+	116533961	Translocation chr3 + → chr2 +
	pHLE2.5a	L1.3	HeLa-RC	An	2305	1	0	0	0	13	2	-	74067970
	pHLE2.9a	L1.3	HeLa-RC	An	2405	1	0	2	0	-3	4	-	27765199
	pHLE2.10a	L1.3	HeLa-RC	An	2552	0	0	2	0	2	6	-	158574145
	pHLE2.11a	L1.3	HeLa-RC	An	3379	1	0	1	0	6	12	+	60539559
	pHLE3.5a	L1.3	HeLa-RC	An	2638	2	0	0	0	0	5	+	12751859
	pHLE3.9a	L1.3	HeLa-RC	An	3039	3	0	0	0	14	7	-	125209937
	pHLE4.4a	L1.3	HeLa-RC	An	2299	2	0	3	0	5	15	+	54588828
	pHLE4.6a	L1.3	HeLa-RC	An	7737	0	0	0	0	13	5	+	33371381
	pHLE4.8a	L1.3	HeLa-RC	An	2642	2	0	3	0	Translocation	2	+	228280194	Translocation chr2 + → chrX +
	pHLE4.11a	L1.3	HeLa-RC	An	2427	1	0	5	0	1	20	-	17275693
	pHLE4.12a	L1.3	HeLa-RC	An	4515	0	0	1	0	16	21	+	10863481
	pHLE5.8a	L1.3	HeLa-RC	An	3402	0	0	2	0	-1111620	6	-	86521790
	pHLE5.9a	L1.3	HeLa-RC	An	4515	0	0	2	0	8	7	-	14282589
	pHLE5.10a	L1.3	HeLa-RC	An	2138	1	0	3	0	-5	1	-	50237288
	pHLE5.14a	L1.3	HeLa-RC	An	2474	2	0	3	0	11	13	-	99661284
	pHLE5.15a	L1.3	HeLa-RC	An	2307	1	0	2	0	3	6	-	100225182
	pHLE5.20b	L1.3	HeLa-RC	An	2510	0	2	4	0	-3	5	+	20358830
	pHLE5.21a	L1.3	HeLa-RC	An	2455	2	0	4	0	16	6	+	50874477
	pHLE6.2a	L1.3	HeLa-RC	An	2797	1	0	7	0	-12	8	-	78615108
	pHLE6.7a	L1.3	HeLa-RC	An	2889	3	0	4	0	6	18	+	62361366
	pHLE6.11a	L1.3	HeLa-RC	An	2324	3	0	5	0	11	7	+	51233595
	pHLE6.18a	L1.3	HeLa-RC	An	2276	0	0	4	0	6	5	-	118850203
	pHLE7.3a	L1.3	HeLa-RC	An	3362	0	0	2	0	14	9	-	76039525
	pHLE7.10a	L1.3	HeLa-RC	An	2393	0	4	0	0	4	X	-	23967100
	pHLE7.28a	L1.3	HeLa-RC	An	8235	0	0	0	0	11	6	-	110222597
	pHLE7.30a	L1.3	HeLa-RC	An	2616	0	U6snRNA	0	0	9	6	-	110222597
	pHLE8.2c	L1.3	HeLa-RC	An	2533	1	0	4	0	-6	2	+	232295820
	pHLE8.3a	L1.3	HeLa-RC	An	5135	0	0	2	0	2	13	-	57285681
	pHLE8.15a	L1.3	HeLa-RC	An	2228	0	1	2	0	3	5	-	72250784
	pHLE8.18a	L1.3	HeLa-RC	An	2282	1	0	4	0	4	4	+	43485686
	pHLE8.22a	L1.3	HeLa-RC	An	4931	4	0	2	0	2	7	-	114495454
	pHLE8.24b	L1.3	HeLa-RC	An	2521	1	0	0	0	1	11	-	41434114
	pHLE8.30a	L1.3	HeLa-RC	An	2630	2	0	0	0	10	12	-	47717375
	pWC1.1a	ZfL2-1	DT40 WT	39	5072	0	1	3	0	7	4	+	14885032
	pWC1.2a	ZfL2-1	DT40 WT	29	2318	1	0	6	0	5	3	-	25282407
	pWC4.1a	ZfL2-1	DT40 WT	23*	3661	0	2	1*	0*	6	19	-	6265350
	pWC7.2a	ZfL2-1	DT40 WT	25	5606	2	0	3	0	6	8	-	2345122
	pWC9.1a	ZfL2-1	DT40 WT	22	3281	2	0	4	0	1	1	-	144812675
	pWC9.2a	ZfL2-1	DT40 WT	25	2557	0	11	4	0	7	4	-	23242359
	pWC10.1a	ZfL2-1	DT40 WT	25	5509	5*	0*	1*	0*	*	*2	+	111993962
	pWC10.2a	ZfL2-1	DT40 WT	15	4820	2	0	2	0	2	4	-	55056605
	pWC10.4a	ZfL2-1	DT40 WT	23	5597	0	4	2	0	-2643	4	+	41775045
	pWC10.6a	ZfL2-1	DT40 WT	18	6365	0	3	3	0	5	3	-	27147736
	pWC11.2a	ZfL2-1	DT40 WT	26	5606	0	2	2	0	1	17	+	7803614
	pWC11.6a	ZfL2-1	DT40 WT	23	5598	1	0	2	0	5	17	-	2451977
	pWC12.1a	ZfL2-1	DT40 WT	22	6084	3	0	2	0	6	4	+	59499361
	pWC13.1a	ZfL2-1	DT40 WT	22	5405	0	1	2	0	7	7	-	10415731
	pWC14.1a	ZfL2-1	DT40 WT	23	3130	0	17	3	0	6	1	-	9179165
	pWC12.4a	ZfL2-1	DT40 WT	20	5613	1	0	2	0	3	3	+	73285080
	pWC12.5a	ZfL2-1	DT40 WT	21*	2333	0	8	1*	0*	8	3	+	71146657
	pWC13.2a	ZfL2-1	DT40 WT	20	5594	2	0	1	0	1	14	+	8190351
	pWC13.4a	ZfL2-1	DT40 WT	24	3792	1	0	1	0	4	4	+	3111857
	pWC13.5a	ZfL2-1	DT40 WT	21	5676	3	0	2	0	2	2	-	101087287
	pWC13.6a	ZfL2-1	DT40 WT	24	2253	0	20	4	0	5	1	+	186772972
	pWC14.3a	ZfL2-1	DT40 WT	19	5592	0	4	1	0	5	5	-	10370532
	pWC14.5a	ZfL2-1	DT40 WT	20	5452	2	0	1	0	7	2	+	120175640
	pWC14.6a	ZfL2-1	DT40 WT	21	4736	0	43	2	0	6	1	+	101462742
	pWC15.1a	ZfL2-1	DT40 WT	19	2677	0	158	0	0	6	2	+	13951003
	pWC15.2a	ZfL2-1	DT40 WT	24	2925	0	18	2	0	8	1	-	165780575
	pWC15.3a	ZfL2-1	DT40 WT	18	6493	1	0	2	0	5	24	-	60761
	pWC16.1a	ZfL2-1	DT40 WT	19	2342	1	0	2	0	4	2	-	26064282
	pWC16.2a	ZfL2-1	DT40 WT	17	2516	2	0	2	0	-15	Z	+	21810624
	pWC16.3a	ZfL2-1	DT40 WT	24	4732	1	0	4	0	6	3	+	61311327
	pWC21.1a	ZfL2-1	DT40 WT	16	6365	0	11	2	0	2	5	+	46583457	Internal deletion
	pWC21.3a	ZfL2-1	DT40 WT	24	6376	1	0	2	0	3	10	-	7394242
	pWC22.1a	ZfL2-1	DT40 WT	23	6494	1	0	3	0	3	15	-	3636795
	p7C2.1a	ZfL2-1	DT40 Ku70-/-	25	3271	0	2	1	0	-438	14	-	1093646
	p7C3.1a	ZfL2-1	DT40 Ku70-/-	19	2216	0	2	0	0	-206	Z	-	13282674
	p7C7.2a	ZfL2-1	DT40 Ku70-/-	20	2614	1	0	2	0	10	14	-	1093646
	p7C24.1a	ZfL2-1	DT40 Ku70-/-	20	2329	0	2	3	0	10	1	-	3986932
	p7C34.2a	ZfL2-1	DT40 Ku70-/-	29	5046	0	6	1	0	-1153	1	-	160093519
	p7C38.1a	ZfL2-1	DT40 Ku70-/-	21	4210	5	0	2	0	-1093	2	-	14679331
	p7C39.3a	ZfL2-1	DT40 Ku70-/-	11	6364	0	55	1	0	10	5	-	1394378
	p7C42.1a	ZfL2-1	DT40 Ku70-/-	21	4571	0	25	4	0	10	4	-	58092284
	p7C43.1a	ZfL2-1	DT40 Ku70-/-	20	6207	3	0	3	0	-157	15	-	8446157
	p7C44.1a	ZfL2-1	DT40 Ku70-/-	30	4226	0	30	1	0	7	6	+	17618477
	p7C45.1a	ZfL2-1	DT40 Ku70-/-	43	4605	0	0	2	0	-1424	3	+	66185500
	p7C47.1a	ZfL2-1	DT40 Ku70-/-	22	2787	0	8	4	0	3	1	-	100042704
	p7C48.1a	ZfL2-1	DT40 Ku70-/-	19	3468	2	0	0	0	0	3	-	8330631
	p7C49.1a	ZfL2-1	DT40 Ku70-/-	22	4322	0	31	2	0	0	8	-	17439933
	p7C50.1a	ZfL2-1	DT40 Ku70-/-	19	6494	2	0	1	0	1	4	+	64482117
	p7C51.1a	ZfL2-1	DT40 Ku70-/-	24	2210	0	3	3	0	2	3	-	79436066
	p7C52.1a	ZfL2-1	DT40 Ku70-/-	20	5602	3	0	1	0	-460	2	+	47868106
	p7C55.1a	ZfL2-1	DT40 Ku70-/-	25	5428	0	39	1	0	2	2	+	116023820
	p7C61.1a	ZfL2-1	DT40 Ku70-/-	25	5453	0	6	2	0	2	2	+	4607884
	p7C62.1a	ZfL2-1	DT40 Ku70-/-	26	6495	0	2	2	0	7	13	-	981739
	p7C63.1a	ZfL2-1	DT40 Ku70-/-	24	3084	0	0	1	0	-4422	12	-	4041036
	Ra102	ZfL2-1	HeLa-RC	26	6489	1	0	2	0	-8	13	+	90383371
	Ra103	ZfL2-1	HeLa-RC	35	3465	4	0	0	3	0	11	-	61758135
	Ra105	ZfL2-1	HeLa-RC	19	2663	2	0	3	0	3	9	-	122199727
	Ra112	ZfL2-1	HeLa-RC	16	2613	0	0	2	0	2	13	-	110221224
	Ra115	ZfL2-1	HeLa-RC	16	2563	2	0	2	0	-3	1	-	54784857
	Ra121	ZfL2-1	HeLa-RC	18	3779	3	0	2	0	6	10	-	23753319
	Ra123	ZfL2-1	HeLa-RC	21	2474	0	1	2	0	-3	6	+	1547787
	Ra124	ZfL2-1	HeLa-RC	20	2336	2	0	2	0	3	7	+	149475024
	Ra125	ZfL2-1	HeLa-RC	26	5507	0	0	3	0	4	1	+	68098583
	Ra126	ZfL2-1	HeLa-RC	19	2337	1	0	1	0	2	12	-	21303956
	Ra201	ZfL2-1	HeLa-RC	19	5577	2	0	1	0	-5	8	+	75006605
	Ra203	ZfL2-1	HeLa-RC	26	4063	5	0	3	0	1	*1	-	194598935*
	Ra205	ZfL2-1	HeLa-RC	22*	2957	2	0	2*	*0	5	12	+	6643780	*abnormal 3´ terminal repeats
	Ra207	ZfL2-1	HeLa-RC	18	5449	1	0	2	0	2	2	+	135866793
	Ra227	ZfL2-1	HeLa-RC	25	2276	2	0	1	0	4	18	-	1538347
	Ra230	ZfL2-1	HeLa-RC	21	2464	3	0	2	0	-42	7	+	138849623
	Ra232	ZfL2-1	HeLa-RC	24	2888	0	0	2	0	-9	15	+	75924940
	Ra501	ZfL2-1	HeLa-RC	20	4194	4	0	1	0	4	8	+	2989176
	Ra506	ZfL2-1	HeLa-RC	24	5801	0	0	0	0	4	6	+	85414340
	Ra507	ZfL2-1	HeLa-RC	25	2335	1	0	1	0	4	5	-	124785563
	Ra510	ZfL2-1	HeLa-RC	25	3481	1	0	2	0	5	5	+
	Ra511	ZfL2-1	HeLa-RC	20	3042	3	0	1	0	4	19	-	49955315
	Ra512	ZfL2-1	HeLa-RC	19	6485	0	0	3	0	5	2	-	112252488
	Ra513	ZfL2-1	HeLa-RC	14	2918	2	0	0	0	9	1	+	1265095
	Ra514	ZfL2-1	HeLa-RC	19	2350	3	0	1	0	2	21	+	34821087
	Ra515	ZfL2-1	HeLa-RC	29	5500	2	0	3	0	-9	3	+	44446472
	Ra701	ZfL2-1	HeLa-RC	26	2385	2	0	3	0	5	4	-	174629124
	Ra705	ZfL2-1	HeLa-RC	21*	3128	0	40	1*	0*	-24	3	-	1539076	*abnormal 3´ terminal repeats
	Ra707	ZfL2-1	HeLa-RC	26*	3086	2	0	1*	0*	1	20	-	49947545	*abnormal 3´ terminal repeats
	Ra708	ZfL2-1	HeLa-RC	21*	2986	2	0	1*	0*	6	1	+	110228418	*abnormal 3´ terminal repeats
	pWG2.3a	Nimb2	DT40 WT	21	7378	*0	0	2	0	14	1	-	14886468
	pWG2.4a	Nimb2	DT40 WT	23	2725	1	0	4	0	7	1	+	51373420
	pWG3.1a	Nimb2	DT40 WT	15	2041	0	15	2	0	11	12	+	11297602
	pWG3.2a	Nimb2	DT40 WT	18	6543	4	0	1	0	-21	5	+	49034845
	pWG3.3a	Nimb2	DT40 WT	18	2361	1	0	2	0	15	2	-	100409803
	pWG4.5a	Nimb2	DT40 WT	17	5958	0	3	1	0	12	2	-	27211870
	pWG5.1b	Nimb2	DT40 WT	26	7378	0	0	2	0	12	4	+	55631541
	pWG5.2a	Nimb2	DT40 WT	22	7378	0	0	2	0	-25	2	-	106046497
	pWG5.3a	Nimb2	DT40 WT	22	2903	0	4	3	0	13	1	+	17154081
	pWG5.4a	Nimb2	DT40 WT	18	3575	6	0	2	0	13	5	-	3874075
	pWG5.5a	Nimb2	DT40 WT	24	7378	0	0	2	0	12	20	-	7231360
	pWG6.3a	Nimb2	DT40 WT	21	7379	1	0	1	0	13	9	+	17176134
	pWG7.5a	Nimb2	DT40 WT	18	7378	0	0	2	0	13	2	-	151147006
	pWG7.2a	Nimb2	DT40 WT	23	6099	2	0	2	0	14	3	+	66396868
	pWG7.6a	Nimb2	DT40 WT	21	2563	0	3	1	0	-3	7	-	32379370
	pWG8.1a	Nimb2	DT40 WT	25	7378	*0	0	2	0	12	2	-	107240246
	pWG8.2a	Nimb2	DT40 WT	20	3725	2	0	2	0	-4	2	-	7962818
	pWG8.3a	Nimb2	DT40 WT	18	2600	0	10	4	0	14	4	+	58952821
	pWG9.2a	Nimb2	DT40 WT	23	3986	3	0	5	0	6	3	-	24931310
	pWG9.3a	Nimb2	DT40 WT	21	2351	2	0	4	0	12	3	+	7962818
	pWG10.1a	Nimb2	DT40 WT	13	7378	2	0	2	0	13	4	-	59955414
	pWG10.3a	Nimb2	DT40 WT	19	7378	*0	0	2	0	12	10	-	7795479
	pWG11.2a	Nimb2	DT40 WT	21	4450	1	0	4	0	14	1	-	79972434
	pWG12.2a	Nimb2	DT40 WT	19	2440	0	6	2	0	14	12	+	19784079
	pWG13.1a	Nimb2	DT40 WT	17	6407	3	0	2	0	2	13	+	3406951
	pWG13.2a	Nimb2	DT40 WT	19	7379	0	0	0	0	13	18	-	3093921
	pWG14.1a	Nimb2	DT40 WT	22	7378	*0	0	2	0	12	1	-	172048449
	pWG14.2a	Nimb2	DT40 WT	21	3566	3	0	6	0	13	2	-	15111955
	pWG15.1a	Nimb2	DT40 WT	14	2453	3	0	*0	*4	3	15	+	2079463
	pWG16.1a	Nimb2	DT40 WT	21	2730	0	0	3	0	5	8	+	7931493
	pHLE2.1a	L1.3	HeLa-RC	An	2947	2	0	1	0	13	5	-	28052433	5´ inversion, inverted LINE (1080 bp)
	pHLE3.8a	L1.3	HeLa-RC	An	3009	2	0	0	0	16	9	-	3034971	5´ inversion, inverted LINE (1288 bp)
	pHLE3.11a	L1.3	HeLa-RC	An	6046	3	0	1	0	17	7	+	76875115	5´ inversion, inverted LINE (2043 bp)
	pHLE4.2a	L1.3	HeLa-RC	An	7212	1	0	3	0	15	8	+	109437894	5´ inversion, inverted LINE (524 bp)
	pHLE4.5a	L1.3	HeLa-RC	An	219	0	0	0	0	14	5	-	152282810	5´ inversion, inverted LINE (1959 bp)
	pHLE2.6a	L1.3	HeLa-RC	An	4901	2	0	3	0	17	16	+	66873766	5´ inversion, inverted LINE (1332 bp)
	pHLE4.9a	L1.3	HeLa-RC	An	2230	3	0	0	0	10	2	-	154790258	5´ inversion, inverted LINE (4017 bp)
	pHLE5.16a	L1.3	HeLa-RC	An	843	3	0	2	0	15	X	+	29334865	5´ inversion, inverted LINE (1395 bp)
	pHLE6.19a	L1.3	HeLa-RC	An	1220	6	0	0	0	14	11	-	54910101	5´ inversion, inverted LINE (953 bp)
	pHLE7.8a	L1.3	HeLa-RC	An	828	5	0	1	0	18	5	-	107821707	5´ inversion, inverted LINE (2017 bp)
	pHLE7.20b	L1.3	HeLa-RC	An	-204	0	0	0	0	5	5	+	110222597	5´ inversion, inverted LINE (2870 bp)
	pHLE8.12a	L1.3	HeLa-RC	An	3554	2	0	3	0	13	11	+	101662258	5´ inversion, inverted LINE (177 bp)
	pHLE8.25a	L1.3	HeLa-RC	An	43	4	0	0	0	17	5	-	36306098	5´ inversion, inverted LINE (2458 bp)
